# Supplementary material for: Water tracing with environmental DNA in a high-Alpine catchment
Source: Copernicus journal article supplement (doi:10.5194/hess-2019-551), 2019-10-23
Supplement: Supplementary file 1 [file hess-2019-551-supplement.zip]

Archive with 3 entries (3 files):
- Maechleretal_alpineedna_20191015_supplement/Maechleretal_alpineedna_20191015_supplement_S0-S3.pdf
- Maechleretal_alpineedna_20191015_supplement/S4_Cummulative_relfreq_threshold.txt
- Maechleretal_alpineedna_20191015_supplement/S5_Species_list.pdf
