# Supplementary material for: Water tracing with environmental DNA in a high-Alpine catchment
Source: Copernicus journal article supplement (doi:10.5194/hess-2019-551), 2019-10-23
Supplement: Supplementary file 1 [file hess-2019-551-supplement.zip › Maechleretal_alpineedna_20191015_supplement/S4_Cummulative_relfreq_threshold.txt]

ZOTU	Total reads in negative controls	Cummulative relative frequency (threshold)
ZOTU2926	450	2.06E-04
ZOTU12	11748	5.39E-03
ZOTU10054	0	0.00E+00
ZOTU3444	0	0.00E+00
ZOTU11820	0	0.00E+00
ZOTU8718	0	0.00E+00
ZOTU10955	0	0.00E+00
ZOTU35	99	4.54E-05
ZOTU9018	0	0.00E+00
ZOTU9135	0	0.00E+00
ZOTU8553	0	0.00E+00
ZOTU4442	0	0.00E+00
ZOTU2793	0	0.00E+00
ZOTU2980	0	0.00E+00
ZOTU801	2	9.17E-07
ZOTU1240	0	0.00E+00
ZOTU406	9	4.13E-06
ZOTU8667	0	0.00E+00
ZOTU1882	116	5.32E-05
ZOTU13185	0	0.00E+00
ZOTU2795	0	0.00E+00
ZOTU2334	0	0.00E+00
ZOTU10657	0	0.00E+00
ZOTU615	4	1.83E-06
ZOTU12075	0	0.00E+00
ZOTU5267	0	0.00E+00
ZOTU8960	387	1.77E-04
ZOTU154	15202	6.97E-03
ZOTU4935	0	0.00E+00
ZOTU11077	0	0.00E+00
ZOTU9930	0	0.00E+00
ZOTU13359	0	0.00E+00
ZOTU888	3	1.38E-06
ZOTU4320	0	0.00E+00
ZOTU66	4	1.83E-06
ZOTU11123	0	0.00E+00
ZOTU3690	2291	1.05E-03
ZOTU13	81824	3.75E-02
ZOTU1480	2	9.17E-07
ZOTU34	4	1.83E-06
ZOTU199	447	2.05E-04
ZOTU4752	7	3.21E-06
ZOTU5253	0	0.00E+00
ZOTU6183	0	0.00E+00
ZOTU7301	0	0.00E+00
ZOTU12260	1	4.59E-07
ZOTU12015	0	0.00E+00
ZOTU12131	0	0.00E+00
ZOTU9310	0	0.00E+00
ZOTU12766	0	0.00E+00
ZOTU3415	0	0.00E+00
ZOTU11059	0	0.00E+00
ZOTU12551	0	0.00E+00
ZOTU4095	0	0.00E+00
ZOTU6990	0	0.00E+00
ZOTU11606	0	0.00E+00
ZOTU10183	0	0.00E+00
ZOTU11368	0	0.00E+00
ZOTU3178	0	0.00E+00
ZOTU11090	0	0.00E+00
ZOTU637	1	4.59E-07
ZOTU10664	0	0.00E+00
ZOTU4466	25	1.15E-05
ZOTU8276	0	0.00E+00
ZOTU3079	0	0.00E+00
ZOTU2411	0	0.00E+00
ZOTU6724	0	0.00E+00
ZOTU1769	26	1.19E-05
ZOTU10044	0	0.00E+00
ZOTU33	107	4.91E-05
ZOTU1796	0	0.00E+00
ZOTU597	1	4.59E-07
ZOTU3619	0	0.00E+00
ZOTU156	80	3.67E-05
ZOTU7990	0	0.00E+00
ZOTU2432	3	1.38E-06
ZOTU4179	0	0.00E+00
ZOTU2216	0	0.00E+00
ZOTU743	25	1.15E-05
ZOTU7566	0	0.00E+00
ZOTU554	54	2.48E-05
ZOTU5132	0	0.00E+00
ZOTU10804	0	0.00E+00
ZOTU6863	401	1.84E-04
ZOTU10400	0	0.00E+00
ZOTU12193	0	0.00E+00
ZOTU601	0	0.00E+00
ZOTU1612	726	3.33E-04
ZOTU512	20	9.17E-06
ZOTU8181	0	0.00E+00
ZOTU175	13703	6.28E-03
ZOTU219	11017	5.05E-03
ZOTU12718	0	0.00E+00
ZOTU5704	0	0.00E+00
ZOTU5674	0	0.00E+00
ZOTU7182	0	0.00E+00
ZOTU3015	0	0.00E+00
ZOTU8655	0	0.00E+00
ZOTU9854	0	0.00E+00
ZOTU10690	0	0.00E+00
ZOTU10705	0	0.00E+00
ZOTU8583	0	0.00E+00
ZOTU794	7708	3.53E-03
ZOTU1669	0	0.00E+00
ZOTU13162	0	0.00E+00
ZOTU13149	0	0.00E+00
ZOTU2535	0	0.00E+00
ZOTU1417	0	0.00E+00
ZOTU4105	0	0.00E+00
ZOTU4034	1	4.59E-07
ZOTU11423	1355	6.21E-04
ZOTU8087	3	1.38E-06
ZOTU13315	0	0.00E+00
ZOTU7216	0	0.00E+00
ZOTU12812	0	0.00E+00
ZOTU12182	2	9.17E-07
ZOTU5373	1	4.59E-07
ZOTU10958	0	0.00E+00
ZOTU2607	0	0.00E+00
ZOTU7833	0	0.00E+00
ZOTU10028	0	0.00E+00
ZOTU13130	0	0.00E+00
ZOTU1277	0	0.00E+00
ZOTU5727	0	0.00E+00
ZOTU6688	0	0.00E+00
ZOTU4591	0	0.00E+00
ZOTU6995	0	0.00E+00
ZOTU4382	0	0.00E+00
ZOTU2952	0	0.00E+00
ZOTU6174	0	0.00E+00
ZOTU2140	0	0.00E+00
ZOTU471	58	2.66E-05
ZOTU2139	39	1.79E-05
ZOTU8866	0	0.00E+00
ZOTU10159	0	0.00E+00
ZOTU6527	0	0.00E+00
ZOTU9539	0	0.00E+00
ZOTU6738	0	0.00E+00
ZOTU2492	1578	7.24E-04
ZOTU2034	438	2.01E-04
ZOTU12393	0	0.00E+00
ZOTU6616	0	0.00E+00
ZOTU10020	0	0.00E+00
ZOTU4907	0	0.00E+00
ZOTU6217	0	0.00E+00
ZOTU5957	0	0.00E+00
ZOTU4724	1	4.59E-07
ZOTU4451	0	0.00E+00
ZOTU1388	0	0.00E+00
ZOTU2525	0	0.00E+00
ZOTU9281	0	0.00E+00
ZOTU10080	0	0.00E+00
ZOTU1544	1	4.59E-07
ZOTU5042	0	0.00E+00
ZOTU6136	0	0.00E+00
ZOTU8985	0	0.00E+00
ZOTU1765	0	0.00E+00
ZOTU8505	0	0.00E+00
ZOTU2429	0	0.00E+00
ZOTU13138	0	0.00E+00
ZOTU2712	0	0.00E+00
ZOTU7605	0	0.00E+00
ZOTU3570	0	0.00E+00
ZOTU673	2	9.17E-07
ZOTU12912	0	0.00E+00
ZOTU6957	0	0.00E+00
ZOTU11031	0	0.00E+00
ZOTU4949	0	0.00E+00
ZOTU6158	0	0.00E+00
ZOTU7668	0	0.00E+00
ZOTU5243	0	0.00E+00
ZOTU1195	0	0.00E+00
ZOTU803	0	0.00E+00
ZOTU7901	0	0.00E+00
ZOTU10049	0	0.00E+00
ZOTU8250	0	0.00E+00
ZOTU8581	0	0.00E+00
ZOTU12434	0	0.00E+00
ZOTU1221	0	0.00E+00
ZOTU3305	0	0.00E+00
ZOTU9156	0	0.00E+00
ZOTU10806	0	0.00E+00
ZOTU2896	293	1.34E-04
ZOTU5936	0	0.00E+00
ZOTU13043	0	0.00E+00
ZOTU2071	2	9.17E-07
ZOTU495	91	4.17E-05
ZOTU6715	0	0.00E+00
ZOTU7424	8	3.67E-06
ZOTU11577	0	0.00E+00
ZOTU12760	18	8.25E-06
ZOTU7151	0	0.00E+00
ZOTU1303	2	9.17E-07
ZOTU2977	0	0.00E+00
ZOTU4792	0	0.00E+00
ZOTU8433	0	0.00E+00
ZOTU9576	0	0.00E+00
ZOTU6447	39	1.79E-05
ZOTU405	0	0.00E+00
ZOTU549	5	2.29E-06
ZOTU7580	0	0.00E+00
ZOTU2657	0	0.00E+00
ZOTU6149	0	0.00E+00
ZOTU5503	0	0.00E+00
ZOTU3771	0	0.00E+00
ZOTU12316	0	0.00E+00
ZOTU13038	0	0.00E+00
ZOTU5205	0	0.00E+00
ZOTU9217	0	0.00E+00
ZOTU9004	0	0.00E+00
ZOTU5487	107	4.91E-05
ZOTU8021	1	4.59E-07
ZOTU3736	0	0.00E+00
ZOTU9476	0	0.00E+00
ZOTU1348	0	0.00E+00
ZOTU3226	0	0.00E+00
ZOTU1180	0	0.00E+00
ZOTU6563	0	0.00E+00
ZOTU11428	0	0.00E+00
ZOTU9578	0	0.00E+00
ZOTU12799	0	0.00E+00
ZOTU4968	0	0.00E+00
ZOTU13272	0	0.00E+00
ZOTU1836	0	0.00E+00
ZOTU65	4481	2.05E-03
ZOTU7866	14	6.42E-06
ZOTU831	2	9.17E-07
ZOTU1294	670	3.07E-04
ZOTU1279	1	4.59E-07
ZOTU10862	0	0.00E+00
ZOTU23	45792	2.10E-02
ZOTU2928	2	9.17E-07
ZOTU1848	3	1.38E-06
ZOTU12206	0	0.00E+00
ZOTU12271	0	0.00E+00
ZOTU317	20	9.17E-06
ZOTU69	12	5.50E-06
ZOTU1750	0	0.00E+00
ZOTU681	50	2.29E-05
ZOTU1664	0	0.00E+00
ZOTU10707	0	0.00E+00
ZOTU9567	0	0.00E+00
ZOTU1080	1	4.59E-07
ZOTU5306	0	0.00E+00
ZOTU2284	0	0.00E+00
ZOTU11377	0	0.00E+00
ZOTU576	1039	4.76E-04
ZOTU1924	0	0.00E+00
ZOTU4640	0	0.00E+00
ZOTU1685	0	0.00E+00
ZOTU387	1	4.59E-07
ZOTU10460	0	0.00E+00
ZOTU8613	0	0.00E+00
ZOTU7224	0	0.00E+00
ZOTU1635	48	2.20E-05
ZOTU2597	0	0.00E+00
ZOTU7438	0	0.00E+00
ZOTU11203	0	0.00E+00
ZOTU2536	0	0.00E+00
ZOTU11308	0	0.00E+00
ZOTU3082	0	0.00E+00
ZOTU10259	6	2.75E-06
ZOTU2050	4	1.83E-06
ZOTU453	17	7.79E-06
ZOTU1582	0	0.00E+00
ZOTU7928	0	0.00E+00
ZOTU3128	253	1.16E-04
ZOTU8106	0	0.00E+00
ZOTU10929	0	0.00E+00
ZOTU8462	0	0.00E+00
ZOTU8897	0	0.00E+00
ZOTU7939	42	1.93E-05
ZOTU13325	0	0.00E+00
ZOTU1249	0	0.00E+00
ZOTU848	1646	7.55E-04
ZOTU8811	0	0.00E+00
ZOTU9859	0	0.00E+00
ZOTU6909	0	0.00E+00
ZOTU11617	0	0.00E+00
ZOTU3958	0	0.00E+00
ZOTU5594	0	0.00E+00
ZOTU202	11552	5.30E-03
ZOTU5203	0	0.00E+00
ZOTU4257	0	0.00E+00
ZOTU5493	0	0.00E+00
ZOTU3135	21	9.63E-06
ZOTU4018	0	0.00E+00
ZOTU6002	0	0.00E+00
ZOTU12242	0	0.00E+00
ZOTU1516	788	3.61E-04
ZOTU10109	0	0.00E+00
ZOTU3366	41	1.88E-05
ZOTU9150	0	0.00E+00
ZOTU3696	0	0.00E+00
ZOTU9872	0	0.00E+00
ZOTU9480	0	0.00E+00
ZOTU12890	0	0.00E+00
ZOTU12339	0	0.00E+00
ZOTU12800	0	0.00E+00
ZOTU11369	0	0.00E+00
ZOTU10899	0	0.00E+00
ZOTU3819	0	0.00E+00
ZOTU9942	0	0.00E+00
ZOTU2228	1	4.59E-07
ZOTU22	56465	2.59E-02
ZOTU2962	383	1.76E-04
ZOTU1338	1028	4.71E-04
ZOTU437	1620	7.43E-04
ZOTU4003	38	1.74E-05
ZOTU11961	0	0.00E+00
ZOTU9921	0	0.00E+00
ZOTU13508	0	0.00E+00
ZOTU7821	0	0.00E+00
ZOTU12174	0	0.00E+00
ZOTU229	9800	4.49E-03
ZOTU11935	0	0.00E+00
ZOTU11278	0	0.00E+00
ZOTU12934	0	0.00E+00
ZOTU13477	0	0.00E+00
ZOTU636	2132	9.78E-04
ZOTU4153	4	1.83E-06
ZOTU10600	0	0.00E+00
ZOTU12965	0	0.00E+00
ZOTU11255	0	0.00E+00
ZOTU8104	49	2.25E-05
ZOTU6132	0	0.00E+00
ZOTU12016	0	0.00E+00
ZOTU7831	1	4.59E-07
ZOTU8078	10	4.59E-06
ZOTU83	2	9.17E-07
ZOTU11801	0	0.00E+00
ZOTU11235	1	4.59E-07
ZOTU8524	0	0.00E+00
ZOTU9642	0	0.00E+00
ZOTU8338	0	0.00E+00
ZOTU4473	0	0.00E+00
ZOTU9194	7	3.21E-06
ZOTU1712	2	9.17E-07
ZOTU2148	0	0.00E+00
ZOTU10442	0	0.00E+00
ZOTU5195	135	6.19E-05
ZOTU1739	861	3.95E-04
ZOTU1723	607	2.78E-04
ZOTU2771	0	0.00E+00
ZOTU13092	0	0.00E+00
ZOTU342	1977	9.06E-04
ZOTU5	116422	5.34E-02
ZOTU323	6169	2.83E-03
ZOTU10046	0	0.00E+00
ZOTU5329	0	0.00E+00
ZOTU6866	0	0.00E+00
ZOTU623	1532	7.02E-04
ZOTU722	3343	1.53E-03
ZOTU5498	106	4.86E-05
ZOTU3354	0	0.00E+00
ZOTU5296	0	0.00E+00
ZOTU11993	0	0.00E+00
ZOTU9995	0	0.00E+00
ZOTU13028	1	4.59E-07
ZOTU9876	0	0.00E+00
ZOTU336	6209	2.85E-03
ZOTU6622	0	0.00E+00
ZOTU3243	0	0.00E+00
ZOTU12612	0	0.00E+00
ZOTU10996	0	0.00E+00
ZOTU5171	0	0.00E+00
ZOTU7839	0	0.00E+00
ZOTU10065	1	4.59E-07
ZOTU10125	0	0.00E+00
ZOTU13444	0	0.00E+00
ZOTU358	9602	4.40E-03
ZOTU2786	0	0.00E+00
ZOTU454	5906	2.71E-03
ZOTU1822	281	1.29E-04
ZOTU4860	109	5.00E-05
ZOTU13114	48	2.20E-05
ZOTU2157	454	2.08E-04
ZOTU8172	0	0.00E+00
ZOTU10610	0	0.00E+00
ZOTU10547	1	4.59E-07
ZOTU11909	12	5.50E-06
ZOTU8744	7	3.21E-06
ZOTU5490	0	0.00E+00
ZOTU428	3628	1.66E-03
ZOTU13342	0	0.00E+00
ZOTU12610	0	0.00E+00
ZOTU6182	0	0.00E+00
ZOTU8883	0	0.00E+00
ZOTU7280	1	4.59E-07
ZOTU12690	0	0.00E+00
ZOTU5156	0	0.00E+00
ZOTU1461	0	0.00E+00
ZOTU7701	0	0.00E+00
ZOTU2288	23	1.05E-05
ZOTU112	1355	6.21E-04
ZOTU10677	0	0.00E+00
ZOTU4707	0	0.00E+00
ZOTU605	351	1.61E-04
ZOTU9908	0	0.00E+00
ZOTU1222	2	9.17E-07
ZOTU4127	0	0.00E+00
ZOTU9856	0	0.00E+00
ZOTU4470	0	0.00E+00
ZOTU2324	4	1.83E-06
ZOTU2981	0	0.00E+00
ZOTU1247	0	0.00E+00
ZOTU836	0	0.00E+00
ZOTU185	154	7.06E-05
ZOTU1126	10	4.59E-06
ZOTU5933	0	0.00E+00
ZOTU7989	0	0.00E+00
ZOTU11300	0	0.00E+00
ZOTU7508	0	0.00E+00
ZOTU9353	0	0.00E+00
ZOTU12531	0	0.00E+00
ZOTU8041	0	0.00E+00
ZOTU6109	10	4.59E-06
ZOTU4890	0	0.00E+00
ZOTU845	1828	8.38E-04
ZOTU10729	0	0.00E+00
ZOTU631	2694	1.24E-03
ZOTU12470	0	0.00E+00
ZOTU2406	0	0.00E+00
ZOTU10057	0	0.00E+00
ZOTU3815	0	0.00E+00
ZOTU4823	110	5.04E-05
ZOTU79	27312	1.25E-02
ZOTU531	3	1.38E-06
ZOTU10391	0	0.00E+00
ZOTU8312	0	0.00E+00
ZOTU8910	0	0.00E+00
ZOTU5418	3	1.38E-06
ZOTU10780	4	1.83E-06
ZOTU13197	16	7.34E-06
ZOTU981	1521	6.97E-04
ZOTU6339	0	0.00E+00
ZOTU11135	0	0.00E+00
ZOTU50	34270	1.57E-02
ZOTU11929	0	0.00E+00
ZOTU6637	0	0.00E+00
ZOTU3523	0	0.00E+00
ZOTU8892	0	0.00E+00
ZOTU7305	0	0.00E+00
ZOTU12832	0	0.00E+00
ZOTU4163	0	0.00E+00
ZOTU355	5607	2.57E-03
ZOTU10864	0	0.00E+00
ZOTU1431	1	4.59E-07
ZOTU5558	0	0.00E+00
ZOTU7824	0	0.00E+00
ZOTU4155	0	0.00E+00
ZOTU696	1	4.59E-07
ZOTU3842	0	0.00E+00
ZOTU7089	0	0.00E+00
ZOTU10010	0	0.00E+00
ZOTU5532	109	5.00E-05
ZOTU5856	0	0.00E+00
ZOTU3514	1	4.59E-07
ZOTU11834	0	0.00E+00
ZOTU8947	0	0.00E+00
ZOTU13016	1	4.59E-07
ZOTU11982	0	0.00E+00
ZOTU8539	0	0.00E+00
ZOTU10401	0	0.00E+00
ZOTU10760	0	0.00E+00
ZOTU1732	1	4.59E-07
ZOTU12188	0	0.00E+00
ZOTU6969	0	0.00E+00
ZOTU105	4	1.83E-06
ZOTU10008	0	0.00E+00
ZOTU6485	0	0.00E+00
ZOTU11128	0	0.00E+00
ZOTU8485	0	0.00E+00
ZOTU7709	0	0.00E+00
ZOTU10354	2	9.17E-07
ZOTU2925	319	1.46E-04
ZOTU9900	0	0.00E+00
ZOTU5022	95	4.36E-05
ZOTU8382	22	1.01E-05
ZOTU8624	0	0.00E+00
ZOTU9044	0	0.00E+00
ZOTU7535	0	0.00E+00
ZOTU1683	647	2.97E-04
ZOTU5005	0	0.00E+00
ZOTU9653	0	0.00E+00
ZOTU9114	2	9.17E-07
ZOTU9293	0	0.00E+00
ZOTU8635	0	0.00E+00
ZOTU12691	15	6.88E-06
ZOTU7083	1	4.59E-07
ZOTU1109	1733	7.95E-04
ZOTU11286	4	1.83E-06
ZOTU3379	177	8.12E-05
ZOTU8989	0	0.00E+00
ZOTU3165	0	0.00E+00
ZOTU8375	0	0.00E+00
ZOTU8820	0	0.00E+00
ZOTU434	8172	3.75E-03
ZOTU3606	166	7.61E-05
ZOTU6992	0	0.00E+00
ZOTU8214	0	0.00E+00
ZOTU8360	0	0.00E+00
ZOTU9961	0	0.00E+00
ZOTU10148	0	0.00E+00
ZOTU3457	0	0.00E+00
ZOTU6610	0	0.00E+00
ZOTU4343	0	0.00E+00
ZOTU3266	0	0.00E+00
ZOTU3599	5	2.29E-06
ZOTU7340	0	0.00E+00
ZOTU6839	0	0.00E+00
ZOTU4662	0	0.00E+00
ZOTU10966	19	8.71E-06
ZOTU8906	0	0.00E+00
ZOTU3146	0	0.00E+00
ZOTU5220	0	0.00E+00
ZOTU7633	0	0.00E+00
ZOTU12068	0	0.00E+00
ZOTU3080	0	0.00E+00
ZOTU7408	0	0.00E+00
ZOTU11709	0	0.00E+00
ZOTU5458	0	0.00E+00
ZOTU11360	0	0.00E+00
ZOTU12725	0	0.00E+00
ZOTU9006	0	0.00E+00
ZOTU12593	0	0.00E+00
ZOTU6771	0	0.00E+00
ZOTU10878	0	0.00E+00
ZOTU6242	0	0.00E+00
ZOTU10079	0	0.00E+00
ZOTU5097	96	4.40E-05
ZOTU12737	0	0.00E+00
ZOTU13376	2	9.17E-07
ZOTU8234	0	0.00E+00
ZOTU4146	0	0.00E+00
ZOTU8455	0	0.00E+00
ZOTU13308	0	0.00E+00
ZOTU10288	0	0.00E+00
ZOTU1365	0	0.00E+00
ZOTU2437	0	0.00E+00
ZOTU4158	1	4.59E-07
ZOTU3826	1	4.59E-07
ZOTU5516	5	2.29E-06
ZOTU11248	0	0.00E+00
ZOTU286	5	2.29E-06
ZOTU5848	1	4.59E-07
ZOTU2718	98	4.49E-05
ZOTU823	0	0.00E+00
ZOTU44	8132	3.73E-03
ZOTU2859	1	4.59E-07
ZOTU11156	12	5.50E-06
ZOTU9159	0	0.00E+00
ZOTU7554	0	0.00E+00
ZOTU10075	0	0.00E+00
ZOTU4	154	7.06E-05
ZOTU162	41	1.88E-05
ZOTU157	311	1.43E-04
ZOTU9002	0	0.00E+00
ZOTU752	1	4.59E-07
ZOTU12035	20	9.17E-06
ZOTU7315	0	0.00E+00
ZOTU2350	14	6.42E-06
ZOTU3275	0	0.00E+00
ZOTU1578	0	0.00E+00
ZOTU12602	0	0.00E+00
ZOTU9386	0	0.00E+00
ZOTU901	6	2.75E-06
ZOTU2354	543	2.49E-04
ZOTU9053	1	4.59E-07
ZOTU2521	0	0.00E+00
ZOTU11803	0	0.00E+00
ZOTU7588	0	0.00E+00
ZOTU13103	0	0.00E+00
ZOTU2873	0	0.00E+00
ZOTU9566	0	0.00E+00
ZOTU7597	0	0.00E+00
ZOTU13479	0	0.00E+00
ZOTU5529	0	0.00E+00
ZOTU3168	0	0.00E+00
ZOTU3300	1	4.59E-07
ZOTU768	16	7.34E-06
ZOTU13148	0	0.00E+00
ZOTU1807	0	0.00E+00
ZOTU3834	0	0.00E+00
ZOTU4649	0	0.00E+00
ZOTU5938	0	0.00E+00
ZOTU5215	0	0.00E+00
ZOTU9337	0	0.00E+00
ZOTU2916	0	0.00E+00
ZOTU4036	0	0.00E+00
ZOTU9986	0	0.00E+00
ZOTU8943	0	0.00E+00
ZOTU5031	2	9.17E-07
ZOTU5102	0	0.00E+00
ZOTU4004	0	0.00E+00
ZOTU396	2642	1.21E-03
ZOTU2664	0	0.00E+00
ZOTU3359	1	4.59E-07
ZOTU1834	1	4.59E-07
ZOTU13501	0	0.00E+00
ZOTU3246	0	0.00E+00
ZOTU639	4	1.83E-06
ZOTU11515	0	0.00E+00
ZOTU11307	0	0.00E+00
ZOTU4296	0	0.00E+00
ZOTU8726	0	0.00E+00
ZOTU190	39	1.79E-05
ZOTU5753	0	0.00E+00
ZOTU7242	0	0.00E+00
ZOTU844	69	3.16E-05
ZOTU2639	1	4.59E-07
ZOTU7522	0	0.00E+00
ZOTU6765	0	0.00E+00
ZOTU13106	0	0.00E+00
ZOTU6948	0	0.00E+00
ZOTU5461	0	0.00E+00
ZOTU8098	2	9.17E-07
ZOTU233	8938	4.10E-03
ZOTU5574	0	0.00E+00
ZOTU8170	0	0.00E+00
ZOTU4467	0	0.00E+00
ZOTU8367	0	0.00E+00
ZOTU214	198	9.08E-05
ZOTU231	1467	6.73E-04
ZOTU1973	0	0.00E+00
ZOTU2185	828	3.80E-04
ZOTU2414	565	2.59E-04
ZOTU6599	0	0.00E+00
ZOTU8097	0	0.00E+00
ZOTU6632	8	3.67E-06
ZOTU12513	0	0.00E+00
ZOTU8458	0	0.00E+00
ZOTU9884	0	0.00E+00
ZOTU6268	0	0.00E+00
ZOTU11870	0	0.00E+00
ZOTU6768	0	0.00E+00
ZOTU10093	0	0.00E+00
ZOTU1512	1	4.59E-07
ZOTU684	383	1.76E-04
ZOTU7386	0	0.00E+00
ZOTU9105	0	0.00E+00
ZOTU3672	0	0.00E+00
ZOTU9392	0	0.00E+00
ZOTU8577	0	0.00E+00
ZOTU1835	1	4.59E-07
ZOTU12358	0	0.00E+00
ZOTU2221	0	0.00E+00
ZOTU9227	9	4.13E-06
ZOTU9147	0	0.00E+00
ZOTU7503	0	0.00E+00
ZOTU10290	0	0.00E+00
ZOTU5648	0	0.00E+00
ZOTU12220	0	0.00E+00
ZOTU2199	0	0.00E+00
ZOTU9115	0	0.00E+00
ZOTU12416	0	0.00E+00
ZOTU7189	1	4.59E-07
ZOTU12389	0	0.00E+00
ZOTU6842	0	0.00E+00
ZOTU8016	0	0.00E+00
ZOTU1077	32	1.47E-05
ZOTU1323	0	0.00E+00
ZOTU6350	0	0.00E+00
ZOTU2118	0	0.00E+00
ZOTU2369	0	0.00E+00
ZOTU6714	0	0.00E+00
ZOTU1875	10	4.59E-06
ZOTU1252	2	9.17E-07
ZOTU7124	0	0.00E+00
ZOTU6067	0	0.00E+00
ZOTU2382	0	0.00E+00
ZOTU1026	0	0.00E+00
ZOTU1623	0	0.00E+00
ZOTU842	12	5.50E-06
ZOTU290	326	1.49E-04
ZOTU6963	0	0.00E+00
ZOTU7277	0	0.00E+00
ZOTU12268	2	9.17E-07
ZOTU13094	0	0.00E+00
ZOTU4937	0	0.00E+00
ZOTU6172	0	0.00E+00
ZOTU2471	0	0.00E+00
ZOTU3263	0	0.00E+00
ZOTU9692	0	0.00E+00
ZOTU9645	0	0.00E+00
ZOTU7294	0	0.00E+00
ZOTU5095	0	0.00E+00
ZOTU12452	0	0.00E+00
ZOTU9291	4	1.83E-06
ZOTU8410	0	0.00E+00
ZOTU2460	5	2.29E-06
ZOTU9589	0	0.00E+00
ZOTU2891	0	0.00E+00
ZOTU2358	0	0.00E+00
ZOTU1185	1	4.59E-07
ZOTU1563	0	0.00E+00
ZOTU4684	0	0.00E+00
ZOTU9833	0	0.00E+00
ZOTU10611	0	0.00E+00
ZOTU9819	0	0.00E+00
ZOTU2304	0	0.00E+00
ZOTU9632	31	1.42E-05
ZOTU10498	0	0.00E+00
ZOTU524	2773	1.27E-03
ZOTU2855	80	3.67E-05
ZOTU4553	17	7.79E-06
ZOTU9397	0	0.00E+00
ZOTU11567	27	1.24E-05
ZOTU3132	1076	4.93E-04
ZOTU2423	176	8.07E-05
ZOTU2769	5	2.29E-06
ZOTU6852	0	0.00E+00
ZOTU9347	0	0.00E+00
ZOTU3341	9	4.13E-06
ZOTU7211	0	0.00E+00
ZOTU4981	32	1.47E-05
ZOTU10359	51	2.34E-05
ZOTU3199	0	0.00E+00
ZOTU7983	0	0.00E+00
ZOTU674	2102	9.64E-04
ZOTU12066	0	0.00E+00
ZOTU13519	0	0.00E+00
ZOTU13428	0	0.00E+00
ZOTU4496	0	0.00E+00
ZOTU7933	0	0.00E+00
ZOTU2030	0	0.00E+00
ZOTU10207	0	0.00E+00
ZOTU170	15088	6.92E-03
ZOTU11907	0	0.00E+00
ZOTU8813	0	0.00E+00
ZOTU1155	2	9.17E-07
ZOTU10710	14	6.42E-06
ZOTU12136	0	0.00E+00
ZOTU10527	0	0.00E+00
ZOTU6788	549	2.52E-04
ZOTU5707	0	0.00E+00
ZOTU10340	0	0.00E+00
ZOTU9134	0	0.00E+00
ZOTU12938	0	0.00E+00
ZOTU11739	0	0.00E+00
ZOTU2581	0	0.00E+00
ZOTU2583	0	0.00E+00
ZOTU11597	0	0.00E+00
ZOTU8230	0	0.00E+00
ZOTU9724	0	0.00E+00
ZOTU13228	0	0.00E+00
ZOTU6397	0	0.00E+00
ZOTU2810	1666	7.64E-04
ZOTU9776	42	1.93E-05
ZOTU4333	41	1.88E-05
ZOTU8588	0	0.00E+00
ZOTU2135	2	9.17E-07
ZOTU1631	560	2.57E-04
ZOTU12058	0	0.00E+00
ZOTU9208	2	9.17E-07
ZOTU12598	0	0.00E+00
ZOTU7803	0	0.00E+00
ZOTU135	16176	7.42E-03
ZOTU1531	0	0.00E+00
ZOTU6917	0	0.00E+00
ZOTU12779	0	0.00E+00
ZOTU6229	0	0.00E+00
ZOTU5875	0	0.00E+00
ZOTU11317	0	0.00E+00
ZOTU12862	0	0.00E+00
ZOTU8948	0	0.00E+00
ZOTU12349	0	0.00E+00
ZOTU11763	0	0.00E+00
ZOTU4130	0	0.00E+00
ZOTU9672	0	0.00E+00
ZOTU4076	4	1.83E-06
ZOTU5865	0	0.00E+00
ZOTU6592	1	4.59E-07
ZOTU13316	0	0.00E+00
ZOTU4499	0	0.00E+00
ZOTU1804	66	3.03E-05
ZOTU12829	0	0.00E+00
ZOTU8399	1	4.59E-07
ZOTU6310	52	2.38E-05
ZOTU4914	0	0.00E+00
ZOTU13187	0	0.00E+00
ZOTU4381	0	0.00E+00
ZOTU12101	0	0.00E+00
ZOTU9842	0	0.00E+00
ZOTU6290	1	4.59E-07
ZOTU2392	0	0.00E+00
ZOTU7314	0	0.00E+00
ZOTU3966	0	0.00E+00
ZOTU7075	0	0.00E+00
ZOTU657	5	2.29E-06
ZOTU8501	0	0.00E+00
ZOTU10907	0	0.00E+00
ZOTU11779	0	0.00E+00
ZOTU13216	0	0.00E+00
ZOTU13494	2	9.17E-07
ZOTU3205	0	0.00E+00
ZOTU2381	354	1.62E-04
ZOTU9365	0	0.00E+00
ZOTU8167	4	1.83E-06
ZOTU9327	0	0.00E+00
ZOTU3221	108	4.95E-05
ZOTU9169	226	1.04E-04
ZOTU10961	25	1.15E-05
ZOTU3339	12	5.50E-06
ZOTU2036	274	1.26E-04
ZOTU12578	18	8.25E-06
ZOTU10039	0	0.00E+00
ZOTU6250	0	0.00E+00
ZOTU6330	0	0.00E+00
ZOTU10554	0	0.00E+00
ZOTU13385	0	0.00E+00
ZOTU4973	0	0.00E+00
ZOTU7505	0	0.00E+00
ZOTU5460	99	4.54E-05
ZOTU7185	0	0.00E+00
ZOTU206	14036	6.44E-03
ZOTU4799	5	2.29E-06
ZOTU3584	0	0.00E+00
ZOTU6328	0	0.00E+00
ZOTU1460	1	4.59E-07
ZOTU10417	0	0.00E+00
ZOTU1397	0	0.00E+00
ZOTU6394	0	0.00E+00
ZOTU1210	277	1.27E-04
ZOTU13276	0	0.00E+00
ZOTU1731	425	1.95E-04
ZOTU7179	0	0.00E+00
ZOTU12369	0	0.00E+00
ZOTU297	8444	3.87E-03
ZOTU7214	0	0.00E+00
ZOTU9249	0	0.00E+00
ZOTU2985	0	0.00E+00
ZOTU12102	0	0.00E+00
ZOTU13299	0	0.00E+00
ZOTU5127	0	0.00E+00
ZOTU4288	0	0.00E+00
ZOTU1132	715	3.28E-04
ZOTU3287	0	0.00E+00
ZOTU7313	0	0.00E+00
ZOTU8281	0	0.00E+00
ZOTU13414	0	0.00E+00
ZOTU4501	0	0.00E+00
ZOTU5380	0	0.00E+00
ZOTU12442	0	0.00E+00
ZOTU4422	0	0.00E+00
ZOTU12453	0	0.00E+00
ZOTU7371	0	0.00E+00
ZOTU4404	0	0.00E+00
ZOTU12390	0	0.00E+00
ZOTU9783	0	0.00E+00
ZOTU10085	0	0.00E+00
ZOTU12059	0	0.00E+00
ZOTU3453	0	0.00E+00
ZOTU6723	0	0.00E+00
ZOTU6460	1	4.59E-07
ZOTU10357	0	0.00E+00
ZOTU9501	0	0.00E+00
ZOTU731	2	9.17E-07
ZOTU2215	0	0.00E+00
ZOTU7479	0	0.00E+00
ZOTU6790	0	0.00E+00
ZOTU13112	0	0.00E+00
ZOTU5505	1	4.59E-07
ZOTU12002	0	0.00E+00
ZOTU5729	0	0.00E+00
ZOTU11962	0	0.00E+00
ZOTU12669	0	0.00E+00
ZOTU5189	0	0.00E+00
ZOTU9693	0	0.00E+00
ZOTU1477	0	0.00E+00
ZOTU12613	0	0.00E+00
ZOTU12880	0	0.00E+00
ZOTU10459	0	0.00E+00
ZOTU4053	0	0.00E+00
ZOTU4971	0	0.00E+00
ZOTU12402	0	0.00E+00
ZOTU3812	0	0.00E+00
ZOTU10895	0	0.00E+00
ZOTU13429	0	0.00E+00
ZOTU12636	1	4.59E-07
ZOTU9309	0	0.00E+00
ZOTU12657	0	0.00E+00
ZOTU11901	0	0.00E+00
ZOTU5542	108	4.95E-05
ZOTU7215	0	0.00E+00
ZOTU12535	0	0.00E+00
ZOTU7753	0	0.00E+00
ZOTU1151	0	0.00E+00
ZOTU11940	0	0.00E+00
ZOTU8774	0	0.00E+00
ZOTU9245	0	0.00E+00
ZOTU3407	0	0.00E+00
ZOTU10980	0	0.00E+00
ZOTU4746	0	0.00E+00
ZOTU8291	0	0.00E+00
ZOTU8596	49	2.25E-05
ZOTU6977	0	0.00E+00
ZOTU4220	0	0.00E+00
ZOTU11994	0	0.00E+00
ZOTU8923	0	0.00E+00
ZOTU1035	2	9.17E-07
ZOTU9573	0	0.00E+00
ZOTU1188	0	0.00E+00
ZOTU6416	0	0.00E+00
ZOTU5244	0	0.00E+00
ZOTU7155	0	0.00E+00
ZOTU12633	0	0.00E+00
ZOTU6422	0	0.00E+00
ZOTU7299	0	0.00E+00
ZOTU2204	0	0.00E+00
ZOTU538	105	4.81E-05
ZOTU8484	0	0.00E+00
ZOTU7602	2	9.17E-07
ZOTU11425	0	0.00E+00
ZOTU5442	0	0.00E+00
ZOTU6512	2	9.17E-07
ZOTU1901	0	0.00E+00
ZOTU8347	4	1.83E-06
ZOTU10300	0	0.00E+00
ZOTU4000	1	4.59E-07
ZOTU12109	0	0.00E+00
ZOTU7348	1	4.59E-07
ZOTU5282	0	0.00E+00
ZOTU9340	0	0.00E+00
ZOTU12500	0	0.00E+00
ZOTU13137	0	0.00E+00
ZOTU13383	0	0.00E+00
ZOTU2152	0	0.00E+00
ZOTU8556	1	4.59E-07
ZOTU1566	0	0.00E+00
ZOTU2410	0	0.00E+00
ZOTU2699	0	0.00E+00
ZOTU13005	0	0.00E+00
ZOTU2532	0	0.00E+00
ZOTU4564	0	0.00E+00
ZOTU10858	0	0.00E+00
ZOTU249	373	1.71E-04
ZOTU12958	0	0.00E+00
ZOTU12769	0	0.00E+00
ZOTU9801	1	4.59E-07
ZOTU11996	0	0.00E+00
ZOTU7512	0	0.00E+00
ZOTU9314	0	0.00E+00
ZOTU10199	0	0.00E+00
ZOTU1420	860	3.94E-04
ZOTU7672	0	0.00E+00
ZOTU9465	0	0.00E+00
ZOTU12874	0	0.00E+00
ZOTU5421	1	4.59E-07
ZOTU10428	0	0.00E+00
ZOTU11912	0	0.00E+00
ZOTU12048	1	4.59E-07
ZOTU2935	174	7.98E-05
ZOTU1992	1	4.59E-07
ZOTU9532	0	0.00E+00
ZOTU10257	0	0.00E+00
ZOTU9054	8	3.67E-06
ZOTU504	0	0.00E+00
ZOTU9723	6	2.75E-06
ZOTU4939	0	0.00E+00
ZOTU1967	2841	1.30E-03
ZOTU9101	0	0.00E+00
ZOTU11387	18	8.25E-06
ZOTU11113	0	0.00E+00
ZOTU3325	0	0.00E+00
ZOTU9012	0	0.00E+00
ZOTU4545	0	0.00E+00
ZOTU5759	0	0.00E+00
ZOTU10618	0	0.00E+00
ZOTU13046	0	0.00E+00
ZOTU8271	0	0.00E+00
ZOTU4948	0	0.00E+00
ZOTU13497	0	0.00E+00
ZOTU12450	0	0.00E+00
ZOTU10732	0	0.00E+00
ZOTU9775	0	0.00E+00
ZOTU4359	0	0.00E+00
ZOTU3750	0	0.00E+00
ZOTU2388	2	9.17E-07
ZOTU3739	0	0.00E+00
ZOTU4828	0	0.00E+00
ZOTU7823	220	1.01E-04
ZOTU3546	0	0.00E+00
ZOTU72	13	5.96E-06
ZOTU11409	0	0.00E+00
ZOTU9014	0	0.00E+00
ZOTU7679	0	0.00E+00
ZOTU12547	0	0.00E+00
ZOTU6941	0	0.00E+00
ZOTU7290	0	0.00E+00
ZOTU6356	0	0.00E+00
ZOTU13443	0	0.00E+00
ZOTU4686	0	0.00E+00
ZOTU9967	0	0.00E+00
ZOTU13498	0	0.00E+00
ZOTU1209	1	4.59E-07
ZOTU9125	0	0.00E+00
ZOTU7158	0	0.00E+00
ZOTU8229	0	0.00E+00
ZOTU8818	0	0.00E+00
ZOTU5484	0	0.00E+00
ZOTU3206	1	4.59E-07
ZOTU9675	0	0.00E+00
ZOTU10538	0	0.00E+00
ZOTU10249	0	0.00E+00
ZOTU13363	0	0.00E+00
ZOTU13334	0	0.00E+00
ZOTU13129	0	0.00E+00
ZOTU9272	35	1.60E-05
ZOTU9324	0	0.00E+00
ZOTU13154	0	0.00E+00
ZOTU12756	0	0.00E+00
ZOTU8573	0	0.00E+00
ZOTU7478	0	0.00E+00
ZOTU6349	0	0.00E+00
ZOTU6457	0	0.00E+00
ZOTU6309	0	0.00E+00
ZOTU8896	0	0.00E+00
ZOTU9749	0	0.00E+00
ZOTU12922	0	0.00E+00
ZOTU10585	0	0.00E+00
ZOTU4618	0	0.00E+00
ZOTU11910	0	0.00E+00
ZOTU334	13	5.96E-06
ZOTU1551	0	0.00E+00
ZOTU1736	0	0.00E+00
ZOTU10754	0	0.00E+00
ZOTU2609	5	2.29E-06
ZOTU7514	0	0.00E+00
ZOTU8264	0	0.00E+00
ZOTU6326	0	0.00E+00
ZOTU13021	0	0.00E+00
ZOTU12632	0	0.00E+00
ZOTU11790	0	0.00E+00
ZOTU10846	0	0.00E+00
ZOTU9844	0	0.00E+00
ZOTU1067	1	4.59E-07
ZOTU12343	0	0.00E+00
ZOTU8421	0	0.00E+00
ZOTU12267	0	0.00E+00
ZOTU12932	0	0.00E+00
ZOTU5537	0	0.00E+00
ZOTU9479	0	0.00E+00
ZOTU8026	0	0.00E+00
ZOTU9244	0	0.00E+00
ZOTU7060	0	0.00E+00
ZOTU10457	0	0.00E+00
ZOTU12543	0	0.00E+00
ZOTU5893	0	0.00E+00
ZOTU10945	0	0.00E+00
ZOTU4376	1	4.59E-07
ZOTU10509	0	0.00E+00
ZOTU7974	0	0.00E+00
ZOTU12276	0	0.00E+00
ZOTU5249	0	0.00E+00
ZOTU9198	0	0.00E+00
ZOTU10017	0	0.00E+00
ZOTU2088	2	9.17E-07
ZOTU1776	0	0.00E+00
ZOTU7956	0	0.00E+00
ZOTU7960	1	4.59E-07
ZOTU2567	0	0.00E+00
ZOTU11071	0	0.00E+00
ZOTU5478	0	0.00E+00
ZOTU1588	0	0.00E+00
ZOTU11288	0	0.00E+00
ZOTU6925	0	0.00E+00
ZOTU12778	0	0.00E+00
ZOTU11799	1	4.59E-07
ZOTU4201	0	0.00E+00
ZOTU2780	21	9.63E-06
ZOTU2553	0	0.00E+00
ZOTU11706	0	0.00E+00
ZOTU12370	0	0.00E+00
ZOTU5230	0	0.00E+00
ZOTU10321	0	0.00E+00
ZOTU6913	0	0.00E+00
ZOTU2688	0	0.00E+00
ZOTU1684	0	0.00E+00
ZOTU10011	0	0.00E+00
ZOTU12735	0	0.00E+00
ZOTU2892	2	9.17E-07
ZOTU430	1	4.59E-07
ZOTU5717	0	0.00E+00
ZOTU9845	0	0.00E+00
ZOTU7946	0	0.00E+00
ZOTU8240	0	0.00E+00
ZOTU222	6	2.75E-06
ZOTU4388	0	0.00E+00
ZOTU1903	290	1.33E-04
ZOTU4440	1	4.59E-07
ZOTU6674	0	0.00E+00
ZOTU6900	0	0.00E+00
ZOTU11584	1	4.59E-07
ZOTU7376	0	0.00E+00
ZOTU7729	0	0.00E+00
ZOTU6934	0	0.00E+00
ZOTU1336	1	4.59E-07
ZOTU1841	0	0.00E+00
ZOTU8843	0	0.00E+00
ZOTU8248	120	5.50E-05
ZOTU3289	0	0.00E+00
ZOTU8566	0	0.00E+00
ZOTU8800	0	0.00E+00
ZOTU12897	0	0.00E+00
ZOTU9547	0	0.00E+00
ZOTU9916	0	0.00E+00
ZOTU11058	0	0.00E+00
ZOTU12518	1	4.59E-07
ZOTU6896	0	0.00E+00
ZOTU9332	0	0.00E+00
ZOTU7556	0	0.00E+00
ZOTU9182	0	0.00E+00
ZOTU7643	0	0.00E+00
ZOTU9674	0	0.00E+00
ZOTU3528	0	0.00E+00
ZOTU7589	0	0.00E+00
ZOTU7286	12	5.50E-06
ZOTU12977	0	0.00E+00
ZOTU12275	0	0.00E+00
ZOTU7872	1	4.59E-07
ZOTU3462	28	1.28E-05
ZOTU2052	7	3.21E-06
ZOTU570	12	5.50E-06
ZOTU498	10	4.59E-06
ZOTU7539	0	0.00E+00
ZOTU8881	0	0.00E+00
ZOTU1457	6	2.75E-06
ZOTU1099	0	0.00E+00
ZOTU12248	0	0.00E+00
ZOTU8585	0	0.00E+00
ZOTU12145	0	0.00E+00
ZOTU8419	0	0.00E+00
ZOTU348	0	0.00E+00
ZOTU11716	0	0.00E+00
ZOTU10555	10	4.59E-06
ZOTU4551	0	0.00E+00
ZOTU12557	33	1.51E-05
ZOTU3845	0	0.00E+00
ZOTU5614	0	0.00E+00
ZOTU2371	2	9.17E-07
ZOTU49	8532	3.91E-03
ZOTU145	16	7.34E-06
ZOTU884	0	0.00E+00
ZOTU717	3	1.38E-06
ZOTU10361	0	0.00E+00
ZOTU103	22499	1.03E-02
ZOTU903	4	1.83E-06
ZOTU12207	0	0.00E+00
ZOTU2596	0	0.00E+00
ZOTU6829	0	0.00E+00
ZOTU10241	0	0.00E+00
ZOTU7284	0	0.00E+00
ZOTU6725	0	0.00E+00
ZOTU2850	880	4.03E-04
ZOTU2834	0	0.00E+00
ZOTU1231	1	4.59E-07
ZOTU11002	0	0.00E+00
ZOTU3344	0	0.00E+00
ZOTU8822	0	0.00E+00
ZOTU10949	0	0.00E+00
ZOTU10058	0	0.00E+00
ZOTU2441	0	0.00E+00
ZOTU10621	0	0.00E+00
ZOTU9129	0	0.00E+00
ZOTU8035	0	0.00E+00
ZOTU6198	1	4.59E-07
ZOTU8974	0	0.00E+00
ZOTU2463	0	0.00E+00
ZOTU10193	0	0.00E+00
ZOTU9982	0	0.00E+00
ZOTU11175	0	0.00E+00
ZOTU4119	0	0.00E+00
ZOTU9259	0	0.00E+00
ZOTU8839	0	0.00E+00
ZOTU1730	0	0.00E+00
ZOTU12687	0	0.00E+00
ZOTU6533	0	0.00E+00
ZOTU8422	0	0.00E+00
ZOTU11844	0	0.00E+00
ZOTU6414	0	0.00E+00
ZOTU10964	0	0.00E+00
ZOTU1055	19	8.71E-06
ZOTU11893	0	0.00E+00
ZOTU2146	0	0.00E+00
ZOTU10314	0	0.00E+00
ZOTU6647	0	0.00E+00
ZOTU1966	0	0.00E+00
ZOTU1938	2	9.17E-07
ZOTU11499	0	0.00E+00
ZOTU7360	0	0.00E+00
ZOTU7137	0	0.00E+00
ZOTU889	1687	7.73E-04
ZOTU7785	0	0.00E+00
ZOTU2970	1	4.59E-07
ZOTU10680	25	1.15E-05
ZOTU289	3	1.38E-06
ZOTU4199	0	0.00E+00
ZOTU653	20788	9.53E-03
ZOTU10422	0	0.00E+00
ZOTU8591	0	0.00E+00
ZOTU12896	0	0.00E+00
ZOTU12584	2	9.17E-07
ZOTU326	2960	1.36E-03
ZOTU676	4	1.83E-06
ZOTU613	1025	4.70E-04
ZOTU2332	1	4.59E-07
ZOTU3220	0	0.00E+00
ZOTU6681	0	0.00E+00
ZOTU4818	0	0.00E+00
ZOTU2328	0	0.00E+00
ZOTU2520	1	4.59E-07
ZOTU9239	0	0.00E+00
ZOTU7838	0	0.00E+00
ZOTU12841	0	0.00E+00
ZOTU12043	0	0.00E+00
ZOTU11924	0	0.00E+00
ZOTU2222	1	4.59E-07
ZOTU11106	0	0.00E+00
ZOTU7538	0	0.00E+00
ZOTU11101	0	0.00E+00
ZOTU2160	1	4.59E-07
ZOTU13089	0	0.00E+00
ZOTU10855	0	0.00E+00
ZOTU9027	0	0.00E+00
ZOTU5868	0	0.00E+00
ZOTU6038	0	0.00E+00
ZOTU6733	0	0.00E+00
ZOTU8503	1	4.59E-07
ZOTU10475	0	0.00E+00
ZOTU10347	0	0.00E+00
ZOTU8153	0	0.00E+00
ZOTU13281	0	0.00E+00
ZOTU9320	0	0.00E+00
ZOTU7390	20	9.17E-06
ZOTU1111	164	7.52E-05
ZOTU12923	0	0.00E+00
ZOTU7938	1	4.59E-07
ZOTU12921	1	4.59E-07
ZOTU4579	28	1.28E-05
ZOTU8164	0	0.00E+00
ZOTU11736	0	0.00E+00
ZOTU3336	0	0.00E+00
ZOTU11017	0	0.00E+00
ZOTU8617	0	0.00E+00
ZOTU11330	0	0.00E+00
ZOTU7978	0	0.00E+00
ZOTU6987	22	1.01E-05
ZOTU5808	0	0.00E+00
ZOTU13235	0	0.00E+00
ZOTU11514	0	0.00E+00
ZOTU11313	0	0.00E+00
ZOTU2880	99	4.54E-05
ZOTU6921	1	4.59E-07
ZOTU3204	1940	8.89E-04
ZOTU11237	17	7.79E-06
ZOTU9592	0	0.00E+00
ZOTU7168	130	5.96E-05
ZOTU11376	0	0.00E+00
ZOTU13341	0	0.00E+00
ZOTU8488	0	0.00E+00
ZOTU8699	3	1.38E-06
ZOTU12754	1	4.59E-07
ZOTU2509	792	3.63E-04
ZOTU9698	0	0.00E+00
ZOTU4615	5	2.29E-06
ZOTU3633	196	8.99E-05
ZOTU11930	0	0.00E+00
ZOTU7977	0	0.00E+00
ZOTU10516	24	1.10E-05
ZOTU9805	0	0.00E+00
ZOTU720	1	4.59E-07
ZOTU8068	1	4.59E-07
ZOTU5347	0	0.00E+00
ZOTU2714	0	0.00E+00
ZOTU11809	0	0.00E+00
ZOTU12327	0	0.00E+00
ZOTU5582	0	0.00E+00
ZOTU11009	0	0.00E+00
ZOTU2602	1	4.59E-07
ZOTU947	1559	7.15E-04
ZOTU4211	0	0.00E+00
ZOTU9195	0	0.00E+00
ZOTU9640	15	6.88E-06
ZOTU6833	0	0.00E+00
ZOTU4531	0	0.00E+00
ZOTU11937	0	0.00E+00
ZOTU1074	0	0.00E+00
ZOTU321	1	4.59E-07
ZOTU2967	0	0.00E+00
ZOTU7653	0	0.00E+00
ZOTU7651	31	1.42E-05
ZOTU1201	1	4.59E-07
ZOTU11270	80	3.67E-05
ZOTU11157	0	0.00E+00
ZOTU3540	0	0.00E+00
ZOTU12158	0	0.00E+00
ZOTU3630	0	0.00E+00
ZOTU4434	0	0.00E+00
ZOTU6472	0	0.00E+00
ZOTU6251	0	0.00E+00
ZOTU9606	0	0.00E+00
ZOTU10532	0	0.00E+00
ZOTU5732	0	0.00E+00
ZOTU812	63	2.89E-05
ZOTU2876	0	0.00E+00
ZOTU1514	0	0.00E+00
ZOTU7615	0	0.00E+00
ZOTU7027	0	0.00E+00
ZOTU5878	0	0.00E+00
ZOTU7096	0	0.00E+00
ZOTU1408	2	9.17E-07
ZOTU13282	0	0.00E+00
ZOTU9443	0	0.00E+00
ZOTU4803	0	0.00E+00
ZOTU11292	0	0.00E+00
ZOTU1131	0	0.00E+00
ZOTU8222	0	0.00E+00
ZOTU7925	0	0.00E+00
ZOTU577	8	3.67E-06
ZOTU6371	0	0.00E+00
ZOTU6401	0	0.00E+00
ZOTU2389	0	0.00E+00
ZOTU9074	0	0.00E+00
ZOTU7041	0	0.00E+00
ZOTU11414	0	0.00E+00
ZOTU11664	0	0.00E+00
ZOTU13076	0	0.00E+00
ZOTU8688	0	0.00E+00
ZOTU9328	0	0.00E+00
ZOTU1679	0	0.00E+00
ZOTU10310	0	0.00E+00
ZOTU12468	0	0.00E+00
ZOTU8616	0	0.00E+00
ZOTU8656	0	0.00E+00
ZOTU3860	0	0.00E+00
ZOTU5929	1	4.59E-07
ZOTU9268	0	0.00E+00
ZOTU6355	72	3.30E-05
ZOTU630	2698	1.24E-03
ZOTU4592	0	0.00E+00
ZOTU9220	0	0.00E+00
ZOTU9835	0	0.00E+00
ZOTU10334	0	0.00E+00
ZOTU8914	0	0.00E+00
ZOTU4284	0	0.00E+00
ZOTU3096	0	0.00E+00
ZOTU892	0	0.00E+00
ZOTU3560	0	0.00E+00
ZOTU7782	0	0.00E+00
ZOTU9464	0	0.00E+00
ZOTU2721	0	0.00E+00
ZOTU5917	0	0.00E+00
ZOTU1318	0	0.00E+00
ZOTU4065	0	0.00E+00
ZOTU11831	0	0.00E+00
ZOTU8537	0	0.00E+00
ZOTU6847	0	0.00E+00
ZOTU10073	0	0.00E+00
ZOTU13461	0	0.00E+00
ZOTU10574	0	0.00E+00
ZOTU11771	0	0.00E+00
ZOTU6256	0	0.00E+00
ZOTU8283	0	0.00E+00
ZOTU8065	667	3.06E-04
ZOTU3091	0	0.00E+00
ZOTU8255	0	0.00E+00
ZOTU647	35	1.60E-05
ZOTU3861	0	0.00E+00
ZOTU10024	0	0.00E+00
ZOTU5422	0	0.00E+00
ZOTU2323	0	0.00E+00
ZOTU6837	0	0.00E+00
ZOTU1309	0	0.00E+00
ZOTU10483	0	0.00E+00
ZOTU3782	0	0.00E+00
ZOTU9446	0	0.00E+00
ZOTU8132	0	0.00E+00
ZOTU692	1	4.59E-07
ZOTU6048	0	0.00E+00
ZOTU6291	0	0.00E+00
ZOTU11164	0	0.00E+00
ZOTU3968	0	0.00E+00
ZOTU1843	0	0.00E+00
ZOTU2244	1	4.59E-07
ZOTU7940	1	4.59E-07
ZOTU7466	0	0.00E+00
ZOTU9106	0	0.00E+00
ZOTU8640	0	0.00E+00
ZOTU9298	0	0.00E+00
ZOTU1456	0	0.00E+00
ZOTU12156	0	0.00E+00
ZOTU5117	0	0.00E+00
ZOTU6892	0	0.00E+00
ZOTU9885	0	0.00E+00
ZOTU6119	0	0.00E+00
ZOTU687	39	1.79E-05
ZOTU10002	0	0.00E+00
ZOTU2056	0	0.00E+00
ZOTU6465	0	0.00E+00
ZOTU2055	1716	7.87E-04
ZOTU12765	0	0.00E+00
ZOTU10578	0	0.00E+00
ZOTU8940	0	0.00E+00
ZOTU9561	0	0.00E+00
ZOTU11480	0	0.00E+00
ZOTU6113	0	0.00E+00
ZOTU12146	0	0.00E+00
ZOTU9934	0	0.00E+00
ZOTU6220	0	0.00E+00
ZOTU7175	0	0.00E+00
ZOTU10358	1	4.59E-07
ZOTU13335	0	0.00E+00
ZOTU9866	0	0.00E+00
ZOTU12400	0	0.00E+00
ZOTU1549	2	9.17E-07
ZOTU13331	0	0.00E+00
ZOTU6585	0	0.00E+00
ZOTU10682	0	0.00E+00
ZOTU10778	46	2.11E-05
ZOTU2999	0	0.00E+00
ZOTU12282	16	7.34E-06
ZOTU905	932	4.27E-04
ZOTU3257	210	9.63E-05
ZOTU179	13169	6.04E-03
ZOTU9827	0	0.00E+00
ZOTU9877	0	0.00E+00
ZOTU5360	0	0.00E+00
ZOTU7972	0	0.00E+00
ZOTU7963	1070	4.91E-04
ZOTU4427	21	9.63E-06
ZOTU8793	45	2.06E-05
ZOTU2565	0	0.00E+00
ZOTU10021	1	4.59E-07
ZOTU11624	0	0.00E+00
ZOTU8851	0	0.00E+00
ZOTU5764	0	0.00E+00
ZOTU7263	1	4.59E-07
ZOTU6763	0	0.00E+00
ZOTU4760	3	1.38E-06
ZOTU11904	0	0.00E+00
ZOTU4123	0	0.00E+00
ZOTU9923	7	3.21E-06
ZOTU12012	0	0.00E+00
ZOTU7435	0	0.00E+00
ZOTU9485	0	0.00E+00
ZOTU8247	226	1.04E-04
ZOTU5314	1	4.59E-07
ZOTU1271	979	4.49E-04
ZOTU10831	5	2.29E-06
ZOTU11671	0	0.00E+00
ZOTU6386	5	2.29E-06
ZOTU10879	0	0.00E+00
ZOTU9040	0	0.00E+00
ZOTU12091	0	0.00E+00
ZOTU9928	0	0.00E+00
ZOTU12617	0	0.00E+00
ZOTU6970	0	0.00E+00
ZOTU8380	3826	1.75E-03
ZOTU7816	0	0.00E+00
ZOTU4175	0	0.00E+00
ZOTU11045	0	0.00E+00
ZOTU9602	7	3.21E-06
ZOTU9403	0	0.00E+00
ZOTU11510	0	0.00E+00
ZOTU10668	0	0.00E+00
ZOTU2482	344	1.58E-04
ZOTU5162	2	9.17E-07
ZOTU1017	1	4.59E-07
ZOTU6648	0	0.00E+00
ZOTU10139	14	6.42E-06
ZOTU12185	0	0.00E+00
ZOTU3636	1	4.59E-07
ZOTU772	1800	8.25E-04
ZOTU10972	1596	7.32E-04
ZOTU10029	1	4.59E-07
ZOTU9969	0	0.00E+00
ZOTU440	36835	1.69E-02
ZOTU7035	0	0.00E+00
ZOTU341	4950	2.27E-03
ZOTU11290	0	0.00E+00
ZOTU2069	0	0.00E+00
ZOTU294	12	5.50E-06
ZOTU7405	0	0.00E+00
ZOTU12674	0	0.00E+00
ZOTU1890	0	0.00E+00
ZOTU2839	28	1.28E-05
ZOTU7014	0	0.00E+00
ZOTU7718	3	1.38E-06
ZOTU704	0	0.00E+00
ZOTU89	14749	6.76E-03
ZOTU11304	0	0.00E+00
ZOTU7748	0	0.00E+00
ZOTU5796	0	0.00E+00
ZOTU4708	134	6.14E-05
ZOTU793	25096	1.15E-02
ZOTU188	6045	2.77E-03
ZOTU2150	0	0.00E+00
ZOTU9875	0	0.00E+00
ZOTU806	1723	7.90E-04
ZOTU2454	0	0.00E+00
ZOTU2681	336	1.54E-04
ZOTU77	20376	9.34E-03
ZOTU13352	115	5.27E-05
ZOTU2948	12	5.50E-06
ZOTU7271	0	0.00E+00
ZOTU10336	0	0.00E+00
ZOTU9421	0	0.00E+00
ZOTU4736	115	5.27E-05
ZOTU9613	0	0.00E+00
ZOTU235	6	2.75E-06
ZOTU7257	0	0.00E+00
ZOTU808	1618	7.42E-04
ZOTU12141	16	7.34E-06
ZOTU6177	0	0.00E+00
ZOTU9170	0	0.00E+00
ZOTU4876	136	6.24E-05
ZOTU8304	1	4.59E-07
ZOTU3010	0	0.00E+00
ZOTU9992	0	0.00E+00
ZOTU6644	0	0.00E+00
ZOTU10674	0	0.00E+00
ZOTU7595	0	0.00E+00
ZOTU4533	0	0.00E+00
ZOTU12807	15	6.88E-06
ZOTU4394	1	4.59E-07
ZOTU5714	0	0.00E+00
ZOTU12322	0	0.00E+00
ZOTU12129	0	0.00E+00
ZOTU675	1514	6.94E-04
ZOTU923	1039	4.76E-04
ZOTU10203	0	0.00E+00
ZOTU13402	0	0.00E+00
ZOTU9865	0	0.00E+00
ZOTU5008	0	0.00E+00
ZOTU4024	0	0.00E+00
ZOTU6167	0	0.00E+00
ZOTU1015	1150	5.27E-04
ZOTU10699	0	0.00E+00
ZOTU5159	0	0.00E+00
ZOTU7900	0	0.00E+00
ZOTU9439	0	0.00E+00
ZOTU2650	1	4.59E-07
ZOTU6965	0	0.00E+00
ZOTU4157	0	0.00E+00
ZOTU5760	0	0.00E+00
ZOTU2020	0	0.00E+00
ZOTU446	2	9.17E-07
ZOTU9991	0	0.00E+00
ZOTU357	5515	2.53E-03
ZOTU12506	0	0.00E+00
ZOTU2236	1	4.59E-07
ZOTU7516	0	0.00E+00
ZOTU12538	0	0.00E+00
ZOTU13188	0	0.00E+00
ZOTU9085	79	3.62E-05
ZOTU8270	0	0.00E+00
ZOTU12279	0	0.00E+00
ZOTU13526	0	0.00E+00
ZOTU9999	0	0.00E+00
ZOTU4918	0	0.00E+00
ZOTU9284	0	0.00E+00
ZOTU11656	0	0.00E+00
ZOTU8709	0	0.00E+00
ZOTU4318	0	0.00E+00
ZOTU10974	0	0.00E+00
ZOTU6750	0	0.00E+00
ZOTU13445	0	0.00E+00
ZOTU1717	0	0.00E+00
ZOTU9980	0	0.00E+00
ZOTU1904	0	0.00E+00
ZOTU7836	0	0.00E+00
ZOTU6131	0	0.00E+00
ZOTU6646	0	0.00E+00
ZOTU11727	0	0.00E+00
ZOTU11158	0	0.00E+00
ZOTU2110	0	0.00E+00
ZOTU3066	0	0.00E+00
ZOTU8559	0	0.00E+00
ZOTU6320	0	0.00E+00
ZOTU8290	0	0.00E+00
ZOTU1503	2	9.17E-07
ZOTU9193	0	0.00E+00
ZOTU12464	0	0.00E+00
ZOTU1813	0	0.00E+00
ZOTU5105	0	0.00E+00
ZOTU2390	0	0.00E+00
ZOTU53	33663	1.54E-02
ZOTU8925	0	0.00E+00
ZOTU3511	48	2.20E-05
ZOTU4951	0	0.00E+00
ZOTU8403	0	0.00E+00
ZOTU1963	8	3.67E-06
ZOTU4931	0	0.00E+00
ZOTU6813	1	4.59E-07
ZOTU982	0	0.00E+00
ZOTU4266	0	0.00E+00
ZOTU2153	0	0.00E+00
ZOTU13237	0	0.00E+00
ZOTU10774	0	0.00E+00
ZOTU5231	0	0.00E+00
ZOTU11960	24	1.10E-05
ZOTU12686	0	0.00E+00
ZOTU2618	0	0.00E+00
ZOTU4361	0	0.00E+00
ZOTU13249	0	0.00E+00
ZOTU10537	0	0.00E+00
ZOTU7091	0	0.00E+00
ZOTU8571	0	0.00E+00
ZOTU6732	0	0.00E+00
ZOTU705	3	1.38E-06
ZOTU173	6	2.75E-06
ZOTU4530	0	0.00E+00
ZOTU7548	0	0.00E+00
ZOTU4500	0	0.00E+00
ZOTU660	2072	9.50E-04
ZOTU9597	0	0.00E+00
ZOTU12603	0	0.00E+00
ZOTU8103	1	4.59E-07
ZOTU6607	0	0.00E+00
ZOTU2431	0	0.00E+00
ZOTU12975	0	0.00E+00
ZOTU11095	1	4.59E-07
ZOTU2262	1	4.59E-07
ZOTU1869	0	0.00E+00
ZOTU1189	0	0.00E+00
ZOTU11484	1	4.59E-07
ZOTU2231	2	9.17E-07
ZOTU3913	0	0.00E+00
ZOTU7897	0	0.00E+00
ZOTU9102	0	0.00E+00
ZOTU7076	0	0.00E+00
ZOTU12507	0	0.00E+00
ZOTU11436	0	0.00E+00
ZOTU5365	0	0.00E+00
ZOTU2366	3	1.38E-06
ZOTU1970	4	1.83E-06
ZOTU4483	0	0.00E+00
ZOTU12283	0	0.00E+00
ZOTU11301	0	0.00E+00
ZOTU8147	0	0.00E+00
ZOTU9049	0	0.00E+00
ZOTU3443	0	0.00E+00
ZOTU7046	0	0.00E+00
ZOTU7042	0	0.00E+00
ZOTU8734	3	1.38E-06
ZOTU2375	1	4.59E-07
ZOTU1216	0	0.00E+00
ZOTU1533	1	4.59E-07
ZOTU909	0	0.00E+00
ZOTU941	11	5.04E-06
ZOTU6951	0	0.00E+00
ZOTU4486	1	4.59E-07
ZOTU11883	0	0.00E+00
ZOTU6385	0	0.00E+00
ZOTU6971	0	0.00E+00
ZOTU2356	0	0.00E+00
ZOTU6085	0	0.00E+00
ZOTU10287	0	0.00E+00
ZOTU205	7	3.21E-06
ZOTU7973	14	6.42E-06
ZOTU2359	0	0.00E+00
ZOTU10170	0	0.00E+00
ZOTU12609	0	0.00E+00
ZOTU3712	0	0.00E+00
ZOTU9285	0	0.00E+00
ZOTU13095	0	0.00E+00
ZOTU9778	0	0.00E+00
ZOTU4996	0	0.00E+00
ZOTU1522	0	0.00E+00
ZOTU12024	0	0.00E+00
ZOTU7945	0	0.00E+00
ZOTU8894	0	0.00E+00
ZOTU822	1925	8.83E-04
ZOTU8770	0	0.00E+00
ZOTU8141	0	0.00E+00
ZOTU6007	0	0.00E+00
ZOTU2308	404	1.85E-04
ZOTU8018	0	0.00E+00
ZOTU4657	0	0.00E+00
ZOTU4262	0	0.00E+00
ZOTU698	62	2.84E-05
ZOTU149	8856	4.06E-03
ZOTU7062	1	4.59E-07
ZOTU12960	0	0.00E+00
ZOTU1073	1	4.59E-07
ZOTU10467	1	4.59E-07
ZOTU10059	0	0.00E+00
ZOTU804	8	3.67E-06
ZOTU802	0	0.00E+00
ZOTU851	2	9.17E-07
ZOTU9621	0	0.00E+00
ZOTU2124	0	0.00E+00
ZOTU8045	0	0.00E+00
ZOTU4751	0	0.00E+00
ZOTU8737	0	0.00E+00
ZOTU3772	0	0.00E+00
ZOTU11957	0	0.00E+00
ZOTU1507	0	0.00E+00
ZOTU9508	0	0.00E+00
ZOTU6736	0	0.00E+00
ZOTU539	0	0.00E+00
ZOTU9947	0	0.00E+00
ZOTU2801	0	0.00E+00
ZOTU828	0	0.00E+00
ZOTU13492	0	0.00E+00
ZOTU1519	778	3.57E-04
ZOTU4098	0	0.00E+00
ZOTU13026	0	0.00E+00
ZOTU2823	0	0.00E+00
ZOTU11891	0	0.00E+00
ZOTU10094	0	0.00E+00
ZOTU2465	0	0.00E+00
ZOTU13045	0	0.00E+00
ZOTU11206	0	0.00E+00
ZOTU2563	1	4.59E-07
ZOTU8233	0	0.00E+00
ZOTU139	9	4.13E-06
ZOTU3259	0	0.00E+00
ZOTU3525	0	0.00E+00
ZOTU2472	0	0.00E+00
ZOTU1957	1	4.59E-07
ZOTU1545	6	2.75E-06
ZOTU9770	0	0.00E+00
ZOTU9643	0	0.00E+00
ZOTU2355	0	0.00E+00
ZOTU744	2	9.17E-07
ZOTU13006	0	0.00E+00
ZOTU1079	2	9.17E-07
ZOTU2439	0	0.00E+00
ZOTU8618	0	0.00E+00
ZOTU1019	3	1.38E-06
ZOTU3955	0	0.00E+00
ZOTU13056	0	0.00E+00
ZOTU3301	213	9.77E-05
ZOTU6368	59	2.71E-05
ZOTU3026	2	9.17E-07
ZOTU11876	0	0.00E+00
ZOTU5823	0	0.00E+00
ZOTU12580	166	7.61E-05
ZOTU9559	172	7.89E-05
ZOTU12887	12	5.50E-06
ZOTU6854	0	0.00E+00
ZOTU13500	14	6.42E-06
ZOTU710	2	9.17E-07
ZOTU7549	0	0.00E+00
ZOTU2857	0	0.00E+00
ZOTU6794	0	0.00E+00
ZOTU3906	0	0.00E+00
ZOTU937	0	0.00E+00
ZOTU6338	1	4.59E-07
ZOTU11361	0	0.00E+00
ZOTU3324	1	4.59E-07
ZOTU7792	0	0.00E+00
ZOTU8527	3	1.38E-06
ZOTU10328	0	0.00E+00
ZOTU4809	0	0.00E+00
ZOTU3373	0	0.00E+00
ZOTU12353	0	0.00E+00
ZOTU2628	322	1.48E-04
ZOTU8204	0	0.00E+00
ZOTU1412	0	0.00E+00
ZOTU11544	0	0.00E+00
ZOTU9470	0	0.00E+00
ZOTU5698	0	0.00E+00
ZOTU2370	0	0.00E+00
ZOTU7923	0	0.00E+00
ZOTU5572	0	0.00E+00
ZOTU1972	0	0.00E+00
ZOTU2854	0	0.00E+00
ZOTU1448	2	9.17E-07
ZOTU1088	0	0.00E+00
ZOTU3114	1	4.59E-07
ZOTU5476	0	0.00E+00
ZOTU8575	0	0.00E+00
ZOTU13347	0	0.00E+00
ZOTU11234	0	0.00E+00
ZOTU371	2	9.17E-07
ZOTU5196	0	0.00E+00
ZOTU10472	0	0.00E+00
ZOTU8729	0	0.00E+00
ZOTU11503	0	0.00E+00
ZOTU8389	0	0.00E+00
ZOTU5887	0	0.00E+00
ZOTU6243	0	0.00E+00
ZOTU4857	0	0.00E+00
ZOTU6162	0	0.00E+00
ZOTU13266	0	0.00E+00
ZOTU2054	48	2.20E-05
ZOTU7784	0	0.00E+00
ZOTU4766	0	0.00E+00
ZOTU5545	0	0.00E+00
ZOTU13099	0	0.00E+00
ZOTU11520	5	2.29E-06
ZOTU5082	119	5.46E-05
ZOTU7319	0	0.00E+00
ZOTU9618	0	0.00E+00
ZOTU3877	148	6.79E-05
ZOTU5901	211	9.67E-05
ZOTU5393	95	4.36E-05
ZOTU204	12311	5.64E-03
ZOTU6780	68	3.12E-05
ZOTU12750	0	0.00E+00
ZOTU2591	284	1.30E-04
ZOTU6152	0	0.00E+00
ZOTU638	1	4.59E-07
ZOTU3800	0	0.00E+00
ZOTU7101	62	2.84E-05
ZOTU6904	0	0.00E+00
ZOTU12942	0	0.00E+00
ZOTU11305	0	0.00E+00
ZOTU6193	0	0.00E+00
ZOTU12202	0	0.00E+00
ZOTU3414	250	1.15E-04
ZOTU10873	0	0.00E+00
ZOTU7883	0	0.00E+00
ZOTU6373	0	0.00E+00
ZOTU7167	0	0.00E+00
ZOTU13323	0	0.00E+00
ZOTU8145	0	0.00E+00
ZOTU5199	0	0.00E+00
ZOTU12011	0	0.00E+00
ZOTU12512	0	0.00E+00
ZOTU7200	0	0.00E+00
ZOTU8936	0	0.00E+00
ZOTU3933	0	0.00E+00
ZOTU3940	0	0.00E+00
ZOTU7790	0	0.00E+00
ZOTU12061	0	0.00E+00
ZOTU900	30	1.38E-05
ZOTU1072	1252	5.74E-04
ZOTU5819	0	0.00E+00
ZOTU10366	0	0.00E+00
ZOTU11171	0	0.00E+00
ZOTU3585	0	0.00E+00
ZOTU7048	0	0.00E+00
ZOTU470	4125	1.89E-03
ZOTU68	29832	1.37E-02
ZOTU9924	0	0.00E+00
ZOTU3024	0	0.00E+00
ZOTU11215	0	0.00E+00
ZOTU9739	0	0.00E+00
ZOTU9489	0	0.00E+00
ZOTU841	0	0.00E+00
ZOTU11628	0	0.00E+00
ZOTU12237	0	0.00E+00
ZOTU5561	0	0.00E+00
ZOTU6442	0	0.00E+00
ZOTU2932	0	0.00E+00
ZOTU10463	0	0.00E+00
ZOTU958	0	0.00E+00
ZOTU9090	0	0.00E+00
ZOTU2756	1	4.59E-07
ZOTU4593	0	0.00E+00
ZOTU2477	0	0.00E+00
ZOTU10745	0	0.00E+00
ZOTU7327	0	0.00E+00
ZOTU10233	0	0.00E+00
ZOTU4184	0	0.00E+00
ZOTU3455	0	0.00E+00
ZOTU10921	0	0.00E+00
ZOTU718	8	3.67E-06
ZOTU8069	0	0.00E+00
ZOTU13240	0	0.00E+00
ZOTU10889	0	0.00E+00
ZOTU2000	0	0.00E+00
ZOTU196	9	4.13E-06
ZOTU12491	2	9.17E-07
ZOTU9144	0	0.00E+00
ZOTU11402	0	0.00E+00
ZOTU8633	0	0.00E+00
ZOTU5867	0	0.00E+00
ZOTU9381	0	0.00E+00
ZOTU13496	0	0.00E+00
ZOTU6550	0	0.00E+00
ZOTU10514	0	0.00E+00
ZOTU10997	0	0.00E+00
ZOTU11096	0	0.00E+00
ZOTU10807	0	0.00E+00
ZOTU7169	0	0.00E+00
ZOTU10769	0	0.00E+00
ZOTU7431	0	0.00E+00
ZOTU11116	0	0.00E+00
ZOTU1900	0	0.00E+00
ZOTU2556	0	0.00E+00
ZOTU3107	0	0.00E+00
ZOTU8116	0	0.00E+00
ZOTU12508	0	0.00E+00
ZOTU10326	0	0.00E+00
ZOTU3475	1	4.59E-07
ZOTU4081	0	0.00E+00
ZOTU12863	0	0.00E+00
ZOTU11011	2	9.17E-07
ZOTU9492	0	0.00E+00
ZOTU13446	0	0.00E+00
ZOTU7469	0	0.00E+00
ZOTU10222	0	0.00E+00
ZOTU1766	0	0.00E+00
ZOTU9358	0	0.00E+00
ZOTU13121	0	0.00E+00
ZOTU13042	0	0.00E+00
ZOTU10245	0	0.00E+00
ZOTU12045	0	0.00E+00
ZOTU12631	0	0.00E+00
ZOTU8426	0	0.00E+00
ZOTU4056	0	0.00E+00
ZOTU8558	0	0.00E+00
ZOTU9372	0	0.00E+00
ZOTU7336	0	0.00E+00
ZOTU1761	0	0.00E+00
ZOTU2811	0	0.00E+00
ZOTU3732	0	0.00E+00
ZOTU7311	0	0.00E+00
ZOTU11003	0	0.00E+00
ZOTU7732	0	0.00E+00
ZOTU13300	0	0.00E+00
ZOTU11861	0	0.00E+00
ZOTU7287	1	4.59E-07
ZOTU4387	0	0.00E+00
ZOTU919	0	0.00E+00
ZOTU2874	0	0.00E+00
ZOTU6296	0	0.00E+00
ZOTU8799	0	0.00E+00
ZOTU9143	0	0.00E+00
ZOTU2690	0	0.00E+00
ZOTU5945	0	0.00E+00
ZOTU4229	0	0.00E+00
ZOTU11325	0	0.00E+00
ZOTU1246	0	0.00E+00
ZOTU5921	0	0.00E+00
ZOTU11871	0	0.00E+00
ZOTU1786	27	1.24E-05
ZOTU10762	0	0.00E+00
ZOTU5617	0	0.00E+00
ZOTU12864	0	0.00E+00
ZOTU7415	1	4.59E-07
ZOTU1455	0	0.00E+00
ZOTU11668	0	0.00E+00
ZOTU5007	0	0.00E+00
ZOTU7361	0	0.00E+00
ZOTU3460	0	0.00E+00
ZOTU11614	0	0.00E+00
ZOTU13318	0	0.00E+00
ZOTU7194	0	0.00E+00
ZOTU2552	0	0.00E+00
ZOTU5303	1	4.59E-07
ZOTU8782	0	0.00E+00
ZOTU5630	0	0.00E+00
ZOTU3310	0	0.00E+00
ZOTU3089	0	0.00E+00
ZOTU1714	0	0.00E+00
ZOTU3399	0	0.00E+00
ZOTU9521	0	0.00E+00
ZOTU2698	0	0.00E+00
ZOTU5138	0	0.00E+00
ZOTU2123	0	0.00E+00
ZOTU8891	0	0.00E+00
ZOTU600	66	3.03E-05
ZOTU6064	0	0.00E+00
ZOTU11202	0	0.00E+00
ZOTU12950	0	0.00E+00
ZOTU11315	0	0.00E+00
ZOTU8628	0	0.00E+00
ZOTU7149	0	0.00E+00
ZOTU12278	0	0.00E+00
ZOTU652	1	4.59E-07
ZOTU11592	0	0.00E+00
ZOTU5172	0	0.00E+00
ZOTU11294	0	0.00E+00
ZOTU268	0	0.00E+00
ZOTU2042	1	4.59E-07
ZOTU13306	0	0.00E+00
ZOTU1359	2	9.17E-07
ZOTU9847	0	0.00E+00
ZOTU11596	0	0.00E+00
ZOTU2611	0	0.00E+00
ZOTU6072	0	0.00E+00
ZOTU3378	0	0.00E+00
ZOTU3694	0	0.00E+00
ZOTU11897	0	0.00E+00
ZOTU2303	122	5.59E-05
ZOTU3222	0	0.00E+00
ZOTU811	1	4.59E-07
ZOTU10689	1	4.59E-07
ZOTU6809	467	2.14E-04
ZOTU3253	0	0.00E+00
ZOTU9202	0	0.00E+00
ZOTU5762	0	0.00E+00
ZOTU3748	0	0.00E+00
ZOTU4194	38	1.74E-05
ZOTU1053	0	0.00E+00
ZOTU384	6166	2.83E-03
ZOTU1945	0	0.00E+00
ZOTU11051	0	0.00E+00
ZOTU9502	0	0.00E+00
ZOTU7565	0	0.00E+00
ZOTU4432	7	3.21E-06
ZOTU6427	0	0.00E+00
ZOTU891	6	2.75E-06
[truncated: 7,859 more rows]
