# Supplementary material for: Water tracing with environmental DNA in a high-Alpine catchment
Source: Copernicus journal article supplement (doi:10.5194/hess-2019-551), 2019-10-23
Supplement: Supplementary file 1 [file hess-2019-551-supplement.zip › Maechleretal_alpineedna_20191015_supplement/S5_Species_list.pdf]

#### S4 - Species list

| Phylum     | Class            | Order           | Family         | Genus                  | Species                              | Reference | Comment |
|------------|------------------|-----------------|----------------|------------------------|--------------------------------------|-----------|---------|
| Annelida   | Clitellata       | Haplotaxida     | Enchytraeidae  | <i>Buchholzia</i>      | <i>Buchholzia appendiculata</i>      |           |         |
|            |                  |                 |                | <i>Buchholzia</i>      | NA                                   |           |         |
|            |                  |                 |                | <i>Chamaedrillus</i>   | <i>Chamaedrillus chlorophilus</i>    |           |         |
|            |                  |                 |                | <i>Fridericia</i>      | <i>Fridericia ratzeli</i>            |           |         |
|            |                  |                 |                | <i>Globulidrilus</i>   | <i>Globulidrilus riparius</i>        |           |         |
|            |                  |                 |                | <i>Henlea</i>          | <i>Henlea nasuta</i>                 |           |         |
|            |                  |                 |                | <i>Henlea</i>          | <i>Henlea perpusilla</i>             |           |         |
|            |                  |                 | Lumbricidae    | <i>Aporrectodea</i>    | <i>Aporrectodea rosea</i>            |           |         |
|            |                  |                 |                | <i>Aporrectodea</i>    | <i>Aporrectodea rosea</i>            |           |         |
|            |                  |                 |                | <i>Aporrectodea</i>    | NA                                   |           |         |
|            |                  |                 |                | <i>Dendrodrilus</i>    | <i>Dendrodrilus rubidus</i>          |           |         |
|            |                  |                 |                | <i>Eiseniella</i>      | <i>Eiseniella tetraedra</i>          |           |         |
|            |                  |                 |                | <i>Lumbricus</i>       | <i>Lumbricus rubellus</i>            |           |         |
|            |                  |                 |                | <i>Lumbricus</i>       | <i>Lumbricus terrestris</i>          |           |         |
|            |                  |                 |                | <i>Octolasion</i>      | <i>Octolasion lacteum</i>            |           |         |
|            |                  |                 |                | <i>Octolasion</i>      | <i>Octolasion tyrtaeum</i>           |           |         |
|            |                  |                 | Tubificidae    | <i>Nais</i>            | <i>Nais communis</i>                 |           |         |
| Arachnida  | Araneae          | Opiliones       | Thomisidae     | <i>Xysticus</i>        | <i>Xysticus gallicus</i>             |           |         |
|            |                  |                 | Phalangidae    | <i>Leiobunum</i>       | <i>Leiobunum limbatum</i>            |           |         |
|            |                  |                 |                | <i>Amilenus</i>        | <i>Amilenus aurantiacus</i>          |           |         |
|            |                  |                 |                | <i>Dicranopalpus</i>   | <i>Dicranopalpus gasteinensis</i>    |           |         |
|            |                  |                 |                | <i>Lacinius</i>        | <i>Lacinius ephippiatus</i>          |           |         |
|            |                  |                 |                | <i>Mitopus</i>         | <i>Mitopus morio</i>                 |           |         |
|            |                  |                 |                | <i>Phalangium</i>      | <i>Phalangium opilio</i>             |           |         |
|            |                  |                 | Sarcoptiformes | <i>Platynothrus</i>    | <i>Platynothrus peltifer</i>         |           |         |
|            |                  |                 |                | <i>Steganacarus</i>    | <i>Steganacarus applicatus</i>       |           |         |
|            |                  | Trombidiformes  | Phytoseptidae  | <i>Phytoseptus</i>     | <i>Phytoseptus alchemillae</i>       |           |         |
| Chilopoda  | Geophilomorpha   | Geophilidae     |                | <i>Brachygeophilus</i> | <i>Brachygeophilus truncorum</i>     |           |         |
|            |                  |                 |                | <i>Geophilus</i>       | <i>Geophilus alpinus</i>             |           |         |
|            |                  |                 |                | <i>Eupolybothrus</i>   | <i>Eupolybothrus tridentinus</i>     |           |         |
|            |                  |                 |                | <i>Lithobius</i>       | <i>Lithobius forficatus</i>          |           |         |
|            | Lithobiomorpha   | Lithobiidae     |                | <i>Lithobius</i>       | <i>Lithobius pelidnus</i>            |           |         |
|            |                  |                 |                | <i>Lithobius</i>       | <i>Lithobius pygmaeus</i>            |           |         |
|            |                  |                 |                | <i>Lithobius</i>       | <i>Lithobius tenebrosus</i>          |           |         |
|            |                  |                 |                | <i>Lithobius</i>       | <i>Lithobius tenebrosus</i>          |           |         |
| Collembola | Entomobryomorpha | Entomobryidae   |                | <i>Entomobrya</i>      | <i>Entomobrya marginata</i>          |           |         |
|            |                  |                 |                | <i>Entomobrya</i>      | <i>Entomobrya nivalis</i>            |           |         |
|            |                  |                 |                | <i>Isotomurus</i>      | <i>Isotomurus graminis</i>           |           |         |
|            | Poduromorpha     | Hypogastruridae |                | <i>Ceratophysella</i>  | <i>Ceratophysella denticulata</i> L3 |           |         |
|            |                  |                 |                | <i>Ceratophysella</i>  | NA                                   |           |         |
|            |                  |                 |                | <i>Neanura</i>         | <i>Neanura muscorum</i>              |           |         |
| Diplopoda  | Glomerida        | Glomeridae      |                | <i>Glomeris</i>        | <i>Glomeris valesiaca</i>            |           |         |
|            |                  |                 |                | <i>Tachypodoiulus</i>  | <i>Tachypodoiulus niger</i>          |           |         |

| Phylum     | Class           | Order                | Family                       | Genus                           | Species                                | Reference                       | Comment      |  |
|------------|-----------------|----------------------|------------------------------|---------------------------------|----------------------------------------|---------------------------------|--------------|--|
| Arthropoda | Insecta         | Archaeognatha        | Machilidae                   | <i>Machilis</i>                 | NA                                     |                                 |              |  |
|            |                 | Coleoptera           | Byrrhidae                    | <i>Byrrhus</i>                  | <i>Byrrhus arietinus</i>               |                                 |              |  |
|            |                 |                      |                              | <i>Ancistronycha</i>            | <i>Ancistronycha abdominalis</i>       |                                 |              |  |
|            |                 |                      | Cantharidae                  | <i>Cantharis</i>                | <i>Cantharis tristis</i>               |                                 |              |  |
|            |                 |                      |                              | <i>Malthodes</i>                | <i>Malthodes brevicollis</i>           |                                 |              |  |
|            |                 |                      |                              | <i>Malthodes</i>                | <i>Malthodes fuscus</i>                |                                 |              |  |
|            |                 |                      |                              | <i>Malthodes</i>                | <i>Malthodes maurus</i>                |                                 |              |  |
|            |                 |                      |                              | <i>Malthodes</i>                | <i>Malthodes pumilus</i>               |                                 |              |  |
|            |                 |                      |                              | <i>Podistra</i>                 | <i>Podistra schoenherri</i>            |                                 |              |  |
|            |                 |                      |                              | Carabidae                       | <i>Bembidion</i>                       | <i>Bembidion incognitum</i>     | Freitag 2009 |  |
|            |                 |                      |                              |                                 | <i>Carabus</i>                         | <i>Carabus auronitens</i>       | Freitag 2009 |  |
|            |                 |                      |                              | Cerambycidae                    | <i>Leiopus</i>                         | <i>Leiopus nebulosus</i>        |              |  |
|            |                 |                      |                              | Chrysomelidae                   | <i>Aphthona</i>                        | <i>Aphthona venustula</i>       |              |  |
|            |                 |                      | <i>Cryptocephalus</i>        |                                 | <i>Cryptocephalus quadripustulatus</i> |                                 |              |  |
|            |                 |                      | <i>Hydrothassa</i>           |                                 | <i>Hydrothassa glabra</i>              |                                 |              |  |
|            |                 |                      | <i>Longitarsus</i>           |                                 | <i>Longitarsus succineus</i>           |                                 |              |  |
|            |                 |                      | <i>Oreina</i>                |                                 | NA                                     |                                 |              |  |
|            |                 |                      | <i>Oreina</i>                |                                 | <i>Oreina bifrons</i>                  |                                 |              |  |
|            |                 |                      | <i>Oreina</i>                |                                 | <i>Oreina speciosa</i>                 |                                 |              |  |
|            |                 |                      | Curculionidae                |                                 | <i>Otiorhynchus</i>                    | <i>Otiorhynchus porcatus</i>    |              |  |
|            |                 |                      |                              |                                 | <i>Phyllobius</i>                      | NA                              |              |  |
|            |                 |                      | Curculionidae                |                                 | <i>Pityogenes</i>                      | <i>Pityogenes chalcographus</i> |              |  |
|            |                 |                      | Elateridae                   | <i>Dalopius</i>                 | <i>Dalopius marginatus</i>             | Freitag 2009                    |              |  |
|            |                 |                      |                              | <i>Sericus</i>                  | <i>Sericus brunneus</i>                |                                 |              |  |
|            |                 |                      |                              | <i>Zorochros</i>                | NA                                     |                                 |              |  |
|            |                 |                      | Helophoridae                 | <i>Helophorus</i>               | <i>Helophorus glacialis</i>            |                                 |              |  |
|            |                 |                      |                              | Hydrophilidae                   | <i>Cercyon</i>                         | <i>Cercyon impressus</i>        |              |  |
|            |                 |                      | <i>Megasternum</i>           |                                 | <i>Megasternum obscurum</i>            |                                 |              |  |
|            |                 |                      | Lampyridae                   | <i>Lampyris</i>                 | <i>Lampyris noctiluca</i>              | Freitag 2009                    |              |  |
|            |                 |                      | Melyridae                    | <i>Dasytes</i>                  | <i>Dasytes cyaneus</i>                 |                                 |              |  |
|            |                 |                      | Psephenidae                  | <i>Eubria</i>                   | <i>Eubria palustris</i>                |                                 |              |  |
|            |                 |                      | Scarabaeidae                 | <i>Aphodius</i>                 | <i>Aphodius rufipes</i>                | Freitag 2009                    |              |  |
|            |                 |                      | Silphidae                    | <i>Phosphuga</i>                | <i>Phosphuga atrata</i>                |                                 |              |  |
|            |                 |                      | Staphylinidae                | <i>Aloconota</i>                | <i>Aloconota currax</i>                |                                 |              |  |
|            |                 | <i>Lathrobium</i>    |                              | <i>Lathrobium fulvipenne</i>    |                                        |                                 |              |  |
|            |                 | <i>Lesteva</i>       |                              | <i>Lesteva monticola</i>        |                                        |                                 |              |  |
|            |                 | <i>Ochtheophilus</i> |                              | <i>Ochtheophilus aureus</i>     |                                        |                                 |              |  |
|            |                 | <i>Platydracus</i>   |                              | <i>Platydracus stercorarius</i> |                                        |                                 |              |  |
|            |                 | <i>Quedius</i>       |                              | <i>Quedius mesomelinus</i>      |                                        |                                 |              |  |
|            |                 | Tenebrionidae        |                              | <i>Cteniopus</i>                | <i>Cteniopus sulphureus</i>            |                                 |              |  |
|            |                 |                      |                              |                                 |                                        |                                 |              |  |
| Diptera    | Blephariceridae | <i>Liponeura</i>     |                              | <i>Liponeura cordata</i>        |                                        |                                 |              |  |
|            | Calliphoridae   | <i>Pollenia</i>      |                              | <i>Pollenia griseotomentosa</i> |                                        |                                 |              |  |
|            | Calliphoridae   | <i>Pollenia</i>      | <i>Pollenia labialis</i>     |                                 |                                        |                                 |              |  |
|            | Ceratopogonidae | <i>Culicoides</i>    | <i>Culicoides chiopterus</i> |                                 |                                        |                                 |              |  |

| Phylum     | Class   | Order   | Family          | Genus                   | Species                           | Reference              | Comment |
|------------|---------|---------|-----------------|-------------------------|-----------------------------------|------------------------|---------|
| Arthropoda | Insecta | Diptera | Ceratopogonidae | <i>Palpomyia</i>        | <i>Palpomyia armipes</i>          |                        |         |
|            |         |         | Chironomidae    | <i>Bryophaenocladus</i> | <i>Bryophaenocladus ictericus</i> |                        |         |
|            |         |         |                 | <i>Chaetocladius</i>    | <i>Chaetocladius perennis</i>     |                        |         |
|            |         |         |                 | <i>Corynoneura</i>      | <i>Corynoneura lobata</i>         |                        |         |
|            |         |         |                 | <i>Diamesa</i>          | <i>Diamesa bertrami</i>           | Gattolliat et al. 2009 |         |
|            |         |         |                 | <i>Diamesa</i>          | <i>Diamesa dampfi</i>             |                        |         |
|            |         |         |                 | <i>Diamesa</i>          | <i>Diamesa goetghebueri</i>       |                        |         |
|            |         |         |                 | <i>Diamesa</i>          | <i>Diamesa latitarsis</i>         | Gattolliat et al. 2009 |         |
|            |         |         |                 | <i>Diamesa</i>          | <i>Diamesa modesta</i>            |                        |         |
|            |         |         |                 | <i>Diamesa</i>          | <i>Diamesa steinboeckii</i>       |                        |         |
|            |         |         |                 | <i>Diamesa</i>          | <i>Diamesa tonsa</i>              |                        |         |
|            |         |         |                 | <i>Diamesa</i>          | <i>Diamesa zernyi</i>             | Gattolliat et al. 2009 |         |
|            |         |         |                 | <i>Diamesa</i>          | NA                                | Gattolliat et al. 2009 |         |
|            |         |         |                 | <i>Limnophyes</i>       | <i>Limnophyes pentaplastus</i>    |                        |         |
|            |         |         |                 | <i>Micropsectra</i>     | <i>Micropsectra notescens</i>     |                        |         |
|            |         |         |                 | <i>Micropsectra</i>     | <i>Micropsectra sofiae</i>        |                        |         |
|            |         |         |                 | <i>Orthocladus</i>      | <i>Orthocladus frigidus</i>       |                        |         |
|            |         |         |                 | <i>Paratrachocladus</i> | <i>Paratrachocladus osellai</i>   |                        |         |
|            |         |         |                 | <i>Rheocricotopus</i>   | <i>Rheocricotopus atripes</i>     |                        |         |
|            |         |         |                 | <i>Tvetenia</i>         | <i>Tvetenia bavarica</i>          |                        |         |
|            |         |         | Empididae       | <i>Rhamphomyia</i>      | <i>Rhamphomyia hybotina</i>       |                        |         |
|            |         |         | Hybotidae       | <i>Platypalpus</i>      | NA                                |                        |         |
|            |         |         | Limoniidae      | <i>Cheilotrichia</i>    | <i>Cheilotrichia cinerascens</i>  |                        |         |
|            |         |         |                 | <i>Dicranomyia</i>      | <i>Dicranomyia didyma</i>         |                        |         |
|            |         |         |                 | <i>Rhipidia</i>         | <i>Rhipidia maculata</i>          |                        |         |
|            |         |         |                 | <i>Phaonia</i>          | <i>Phaonia subventa</i>           |                        |         |
|            |         |         | Muscidae        | <i>Docosia</i>          | <i>Docosia montana</i>            |                        |         |
|            |         |         | Mycetophilidae  | <i>Mycomya</i>          | <i>Mycomya shermani</i>           |                        |         |
|            |         |         | Mycetophilidae  | <i>Megaselia</i>        | <i>Megaselia brevicostalis</i>    |                        |         |
|            |         |         | Phoridae        | <i>Eudorylas</i>        | <i>Eudorylas longifrons</i>       |                        |         |
|            |         |         | Pipunculidae    | <i>Verrallia</i>        | <i>Verrallia aucta</i>            |                        |         |
|            |         |         | Rhagionidae     | <i>Rhagio</i>           | <i>Rhagio lineola</i>             |                        |         |
|            |         |         | Sarcophagidae   | <i>Sarcophaga</i>       | <i>Sarcophaga okaliana</i>        |                        |         |
|            |         |         |                 | <i>Sarcophaga</i>       | <i>Sarcophaga rosellei</i>        |                        |         |
|            |         |         | Scathophagidae  | <i>Scathophaga</i>      | <i>Scathophaga suilla</i>         |                        |         |
|            |         |         | Sciaridae       | <i>Phytosciara</i>      | <i>Phytosciara flavipes</i>       |                        |         |
|            |         |         | Sepsidae        | <i>Sepsis</i>           | <i>Sepsis luteipes</i>            |                        |         |
|            |         |         | Simuliidae      | <i>Prosimulium</i>      | NA                                | Gattolliat et al. 2009 |         |
|            |         |         |                 | <i>Prosimulium</i>      | <i>Prosimulium hirtipes</i>       |                        |         |
|            |         |         |                 | <i>Prosimulium</i>      | <i>Prosimulium latimucro</i>      |                        |         |
|            |         |         |                 | <i>Simulium</i>         | NA                                | Gattolliat et al. 2009 |         |
|            |         |         |                 | <i>Simulium</i>         | <i>Simulium murvanidzei</i>       |                        |         |
|            |         |         | Syrphidae       | <i>Cheilosia</i>        | NA                                |                        |         |
|            |         |         |                 | <i>Chrysotoxum</i>      | NA                                |                        |         |
|            |         |         |                 | <i>Eupeodes</i>         | NA                                |                        |         |

| Phylum     | Class   | Order         | Family         | Genus                 | Species                         | Reference              | Comment |
|------------|---------|---------------|----------------|-----------------------|---------------------------------|------------------------|---------|
| Arthropoda | Insecta | Diptera       | Syrphidae      | <i>Melanostoma</i>    | NA                              |                        |         |
|            |         |               |                | <i>Volucella</i>      | <i>Volucella pellucens</i>      |                        |         |
|            |         |               |                | <i>Xanthandrus</i>    | <i>Xanthandrus comtus</i>       |                        |         |
|            |         |               | Tipulidae      | <i>Tipula</i>         | <i>Tipula truncorum</i>         |                        |         |
|            |         | Ephemeroptera | Baetidae       | <i>Baetis</i>         | <i>Baetis rhodani</i>           | Gattolliat et al. 2009 |         |
|            |         | Hemiptera     | Aphrophoridae  | <i>Philaenus</i>      | <i>Philaenus spumarius</i>      |                        |         |
|            |         |               |                | <i>Diplocolenus</i>   | NA                              |                        |         |
|            |         |               | Cicadellidae   | <i>Eupteryx</i>       | <i>Eupteryx atropunctata</i>    |                        |         |
|            |         |               |                | <i>Euscelis</i>       | <i>Euscelis sordida</i>         |                        |         |
|            |         |               |                | <i>Forcipata</i>      | <i>Forcipata acclina</i>        |                        |         |
|            |         |               |                | <i>Forcipata</i>      | NA                              |                        |         |
|            |         |               |                | <i>Issus</i>          | <i>Issus coleoptratus</i>       |                        |         |
|            |         |               | Miridae        | <i>Atractotomus</i>   | <i>Atractotomus magnicornis</i> |                        |         |
|            |         |               |                | <i>Calocoris</i>      | <i>Calocoris affinis</i>        |                        |         |
|            |         |               |                | <i>Calocoris</i>      | <i>Calocoris alpestris</i>      |                        |         |
|            |         |               |                | <i>Calocoris</i>      | <i>Calocoris alpestris</i>      |                        |         |
|            |         |               |                | <i>Chlamydatus</i>    | <i>Chlamydatus pulicarius</i>   |                        |         |
|            |         |               |                | <i>Lygus</i>          | NA                              |                        |         |
|            |         |               |                | <i>Phytocoris</i>     | NA                              |                        |         |
|            |         |               |                | <i>Phytocoris</i>     | <i>Phytocoris tiliae</i>        |                        |         |
|            |         |               |                | <i>Cacopsylla</i>     | <i>Cacopsylla melanoneura</i>   |                        |         |
|            |         |               |                | <i>Rhyparochromus</i> | <i>Rhyparochromus pini</i>      |                        |         |
|            |         |               | Tingidae       | <i>Trapezonotus</i>   | NA                              |                        |         |
|            |         |               |                | <i>Acalypta</i>       | <i>Acalypta nigrina</i>         |                        |         |
|            |         | Hymenoptera   | Formicidae     | <i>Lasius</i>         | <i>Lasius niger</i>             |                        |         |
|            |         |               |                | <i>Lasius</i>         | <i>Lasius psammophilus</i>      |                        |         |
|            |         |               |                | <i>Lasius</i>         | NA                              |                        |         |
|            |         |               |                | <i>Leptothorax</i>    | <i>Leptothorax canadensis</i>   |                        |         |
|            |         |               |                | <i>Myrmica</i>        | <i>Myrmica lobicornis</i>       |                        |         |
|            |         |               |                | <i>Myrmica</i>        | NA                              |                        |         |
|            |         |               | Tenthredinidae | <i>Euura</i>          | <i>Euura lichtwardti</i>        |                        |         |
|            |         |               |                | <i>Euura</i>          | <i>Euura scutellata</i>         |                        |         |
|            |         |               |                | <i>Phymatocera</i>    | <i>Phymatocera aterrima</i>     |                        |         |
|            |         |               |                |                       |                                 |                        |         |
|            |         | Lepidoptera   | Crambidae      | <i>Anania</i>         | <i>Anania funebris</i>          |                        |         |
|            |         |               |                | <i>Scoparia</i>       | NA                              |                        |         |
|            |         |               | Geometridae    | <i>Dysstroma</i>      | <i>Dysstroma citrata</i>        |                        |         |
|            |         |               |                | <i>Epirrhoe</i>       | <i>Epirrhoe molluginata</i>     |                        |         |
|            |         |               |                | <i>Epirrita</i>       | NA                              |                        |         |
|            |         |               |                | <i>Eupithecia</i>     | <i>Eupithecia tantillaria</i>   |                        |         |
|            |         |               |                | <i>Thera</i>          | <i>Thera vetustata</i>          |                        |         |
|            |         |               | Gracillariidae | <i>Phyllonorycter</i> | NA                              |                        |         |
|            |         |               | Nepticulidae   | <i>Stigmella</i>      | <i>Stigmella dryadella</i>      |                        |         |
|            |         |               | Noctuidae      | <i>Hada</i>           | <i>Hada plebeja</i>             |                        |         |
|            |         |               | Tortricidae    | <i>Bactra</i>         | <i>Bactra lancealana</i>        |                        |         |
|            |         |               |                | <i>Dichrorampha</i>   | <i>Dichrorampha montanana</i>   |                        |         |

| Phylum       | Class       | Order           | Family           | Genus                 | Species                         | Reference              | Comment                                            |
|--------------|-------------|-----------------|------------------|-----------------------|---------------------------------|------------------------|----------------------------------------------------|
| Arthropoda   | Insecta     | Lepidoptera     | Tortricidae      | <i>Epinotia</i>       | <i>Epinotia tedella</i>         |                        |                                                    |
|              |             |                 |                  | <i>Lathronympha</i>   | <i>Lathronympha strigana</i>    |                        |                                                    |
|              |             |                 |                  | <i>Syndemis</i>       | <i>Syndemis musculana</i>       |                        |                                                    |
|              |             | Neuroptera      | Hemerobiidae     | <i>Hemerobius</i>     | NA                              |                        |                                                    |
|              |             | Orthoptera      | Acrididae        | <i>Chorthippus</i>    | <i>Chorthippus parallelus</i>   |                        |                                                    |
|              |             |                 |                  | <i>Chorthippus</i>    | <i>Chorthippus parallelus</i>   |                        |                                                    |
|              |             |                 |                  | <i>Omocestus</i>      | NA                              |                        |                                                    |
|              |             | Plecoptera      | Leuctridae       | <i>Podisma</i>        | <i>Podisma pedestris</i>        | Freitag 2009           |                                                    |
|              |             |                 |                  | <i>Leuctra</i>        | <i>Leuctra alpina</i>           |                        |                                                    |
|              |             |                 |                  | <i>Leuctra</i>        | <i>Leuctra rosinae</i>          |                        |                                                    |
|              |             | Psocoptera      | Taeniopterygidae | <i>Rhabdiopteryx</i>  | <i>Rhabdiopteryx neglecta</i>   |                        |                                                    |
|              |             |                 | Caeciliusidae    | <i>Valenzuela</i>     | <i>Valenzuela burmeisteri</i>   |                        |                                                    |
|              |             |                 |                  | <i>Valenzuela</i>     | <i>Valenzuela flavidus</i>      |                        |                                                    |
| Chordata     | Maxillopoda | Cyclopoida      | Cyclopidae       | <i>Peripsocus</i>     | <i>Peripsocus subfasciatus</i>  |                        |                                                    |
|              |             |                 |                  | <i>Graphopsocus</i>   | <i>Graphopsocus cruciatus</i>   |                        |                                                    |
|              | Trichoptera | Limnephilidae   |                  | <i>Drusus</i>         | <i>Drusus biguttatus</i>        | Gattolliat et al. 2009 |                                                    |
|              |             |                 |                  | <i>Halesus</i>        | <i>Halesus rubricollis</i>      |                        |                                                    |
|              | Actinopteri | Salmoniformes   | Salmonidae       | <i>Mesocyclops</i>    | NA                              |                        |                                                    |
|              | Amphibia    | Anura           | Ranidae          | <i>Salmo</i>          | NA                              |                        | COI not ideal to identify fish species             |
|              |             | Caudata         | Salamandridae    | <i>Rana</i>           | <i>Rana temporaria</i>          | Helper & Monney 2009   |                                                    |
|              | Aves        | Galliformes     | Phasianidae      | <i>Salamandra</i>     | <i>Salamandra atra</i>          | Helper & Monney 2009   |                                                    |
|              |             |                 |                  | <i>Lagopus</i>        | <i>Lagopus muta</i>             | Morard 2009            |                                                    |
|              |             |                 |                  | <i>Cinclus</i>        | <i>Cinclus cinclus</i>          | Morard 2009            |                                                    |
|              |             |                 |                  | <i>Pyrrhocorax</i>    | <i>Pyrrhocorax graculus</i>     | Morard 2009            |                                                    |
|              |             |                 |                  | <i>Fringilla</i>      | <i>Fringilla coelebs</i>        | Morard 2009            |                                                    |
|              |             |                 |                  | <i>Phoenicurus</i>    | <i>Phoenicurus ochruros</i>     | Morard 2009            |                                                    |
|              | Mammalia    | Artiodactyla    | Bovidae          | <i>Turdus</i>         | <i>Turdus philomelos</i>        |                        |                                                    |
|              |             |                 |                  | <i>Bos</i>            | <i>Bos taurus</i>               |                        | Addition of BSA in the lab, maybe articial finding |
|              |             |                 |                  | <i>Rupicapra</i>      | <i>Rupicapra rupicapra</i>      | Marchesi et al. 2009   |                                                    |
|              |             |                 |                  | <i>Cervus</i>         | <i>Cervus elaphus</i>           | Marchesi et al. 2009   |                                                    |
|              |             | Carnivora       | Suidae           | <i>Sus</i>            | <i>Sus scrofa</i>               | Marchesi et al. 2009   |                                                    |
|              |             |                 |                  | <i>Mustela</i>        | <i>Mustela nivalis</i>          | Marchesi et al. 2009   |                                                    |
|              |             | Primates        | Hominidae        | <i>Homo</i>           | <i>Homo sapiens</i>             |                        |                                                    |
|              |             |                 |                  | <i>Chionomys</i>      | <i>Chionomys nivalis</i>        | Marchesi et al. 2009   |                                                    |
|              |             | Rodentia        | Cricetidae       | <i>Myodes</i>         | <i>Myodes glareolus</i>         | Marchesi et al. 2009   | Synonym: <i>Clethrionomys glareolus</i>            |
|              |             |                 |                  | <i>Apodemus</i>       | <i>Apodemus flavicollis</i>     | Marchesi et al. 2009   |                                                    |
| Gastrotricha | NA          | Chaetonotida    | Chaetonotidae    | <i>Vipera</i>         | <i>Vipera berus</i>             | Helper & Monney 2009   |                                                    |
|              |             |                 |                  | <i>Lepidodermella</i> | <i>Lepidodermella squamata</i>  |                        |                                                    |
| Mollusca     | Gastropoda  | Basommatophora  | Physidae         | <i>Physella</i>       | <i>Physella acuta</i>           |                        |                                                    |
|              |             | Neotaenioglossa | Hydrobiidae      | <i>Potamopyrgus</i>   | <i>Potamopyrgus antipodarum</i> |                        |                                                    |
|              |             | Stylommatophora | Arionidae        | <i>Arion</i>          | <i>Arion distinctus</i>         |                        |                                                    |
|              |             |                 | Arionidae        | <i>Arion</i>          | <i>Arion lusitanicus</i>        | Fournier & Burri 2009  |                                                    |
|              |             |                 | Chondrinidae     | <i>Abida</i>          | <i>Abida secale</i>             | Fournier & Burri 2009  |                                                    |
|              |             |                 | Cochlicopidae    | <i>Cochlicopa</i>     | <i>Cochlicopa lubrica</i>       | Fournier & Burri 2009  |                                                    |
|              |             |                 | Helicidae        | <i>Arianta</i>        | <i>Arianta arbustorum</i>       | Fournier & Burri 2009  |                                                    |

| Phylum   | Class       | Order           | Family             | Genus             | Species                     | Reference             | Comment                         |
|----------|-------------|-----------------|--------------------|-------------------|-----------------------------|-----------------------|---------------------------------|
| Mollusca | Gastropoda  | Stylommatophora | Helicidae          | <i>Macularia</i>  | <i>Macularia sylvatica</i>  | Fournier & Burri 2009 | Synonym: <i>Cepea sylvatica</i> |
|          |             |                 | Limacidae          | <i>Lehmannia</i>  | <i>Lehmannia marginata</i>  |                       |                                 |
|          |             |                 | Vertiginidae       | <i>Vertigo</i>    | <i>Vertigo pusilla</i>      |                       |                                 |
| Nematoda | Chromadorea | Rhabditida      | Trichostrongylidae | <i>Ostertagia</i> | <i>Ostertagia ostertagi</i> |                       |                                 |
| Rotifera | Monogononta | Ploima          | Brachionidae       | <i>Keratella</i>  | <i>Keratella cochlearis</i> |                       |                                 |
|          |             |                 | Lecanidae          | <i>Lecane</i>     | <i>Lecane closterocerca</i> |                       |                                 |
|          |             |                 | Synchaetidae       | <i>Polyarthra</i> | <i>Polyarthra vulgaris</i>  |                       |                                 |
